# Supplementary material for: GFPT2/GFAT2 and AMDHD2 act in tandem to control the hexosamine pathway
Source: eLife journal article supplement (doi:10.7554/elife.69223), 2022-03-01
Supplement: fig1-data1 [file Figure1C.xlsx]

## Sheet: Sheet1
XTT assay of four TM resistant clones identified via insertional mutagenesis compared to control WT AN3-12 cells.
Fig. 1C
Treatment	0.5 µg/ml tunicamycin for 48h
	relative fraction alive (Fold change)
	replicate 1	replicate 2	replicate 3	replicate 4	p-value
control	1	1	1	1
clone 1	3.63831	2.89708	2.34047	3.4888	0.0073
clone 2	3.75499	4.40693	1.68141	2.53036	0.0072
clone 3	2.76958	3.4357	2.10778	2.84861	0.021
clone 4	4.13887	3.25657	1.77188	2.46527	0.0139
Ordinary one-way ANOVA
Dunnett's multiple comparisons test
n = 4
