# Supplementary material for: GFPT2/GFAT2 and AMDHD2 act in tandem to control the hexosamine pathway
Source: eLife journal article supplement (doi:10.7554/elife.69223), 2022-03-01
Supplement: fig1-data1 [file Figure1D.xlsx]

## Sheet: Sheet1
Western blot analysis of CRISPR/Cas9 generated AMDHD2 KO AN3‑12 mESCs compared to wildtype cells (ctrl).
Fig. 1D
											antibodies used:
	antibodies used:										a-TUBULIN (ms, clone B-5-1-2, Sigma T9026, 1:5000 in 5% milk TBST)
	Anti-AMDHD2 (ms, in-house produced, S6 clone, 1:500 in 5% milk TBST)										goat anti-mouse IgG (HRP-conjugated, G21040, Thermo Fisher, 1:5000 in 5% milk TBST)
	goat anti-mouse IgG (HRP-conjugated, G21040, Thermo Fisher, 1:5000 in 5% milk TBST)
