# Supplementary material for: GFPT2/GFAT2 and AMDHD2 act in tandem to control the hexosamine pathway
Source: eLife journal article supplement (doi:10.7554/elife.69223), 2022-03-01
Supplement: fig1-data1 [file Figure1E.xlsx]

## Sheet: Sheet1
Cell viability (XTT assay) of WT and AMDHD2 KO AN3‑12 cells
Fig. 1E
Treatment	0.5 µg/ml tunicamycin for 48h
	relative fraction alive
	replicate 1	replicate 2	replicate 3	replicate 4
control	1	1	1	1
AMDHD2 KO (line 1)	5.17461	5.19284	3.46364	2.91806
unpaired t-test (two-tailed)
n = 4
p-value = 0,0016
