# Supplementary material for: GFPT2/GFAT2 and AMDHD2 act in tandem to control the hexosamine pathway
Source: eLife journal article supplement (doi:10.7554/elife.69223), 2022-03-01
Supplement: fig1-figsupp1-data1 [file Figure1FigureSupplement1A.xlsx]

## Sheet: Sheet1
Cell viability (XTT assay) of WT AN3-12 cells and four TM resistant clones identified by chemical (ENU) mutagenesis
Figure 1-Fig. Suppl. 1A
Treatment	0.5 µg/ml tunicamycin for 48h
	relative fraction alive
	replicate 1
control	1
clone A	2.9953
clone B	3.49709
clone C	3.15373
clone D	3.64216
