# Supplementary material for: GFPT2/GFAT2 and AMDHD2 act in tandem to control the hexosamine pathway
Source: eLife journal article supplement (doi:10.7554/elife.69223), 2022-03-01
Supplement: fig1-figsupp1-data1 [file Figure1FigureSupplement1D.xlsx]

## Sheet: Sheet1
XTT assay of WT and two additional AMDHD2 KO AN3-12 cell lines (#2-3)
Figure 1-Fig. Suppl. 1D
Treatment	0.5 µg/ml tunicamycin for 48h
	relative fraction alive
	replicate 1	replicate 2	replicate 3	replicate 4	replicate 5	replicate 6	p-value
control	1	1	1	1	1	1
AMDHD2 KO clone #2	2.66118	3.37921	3.63409	3.6436	3.49357	2.71377	<0,0001
AMDHD2 KO clone #3	3.06471	4.16044	3.88717	3.34048	3.45004	2.62812	<0,0001
Ordinary one-way ANOVA
Tukey's multiple comparisons test
n = 6
