# Supplementary material for: GFPT2/GFAT2 and AMDHD2 act in tandem to control the hexosamine pathway
Source: eLife journal article supplement (doi:10.7554/elife.69223), 2022-03-01
Supplement: fig2-data1 [file Figure2B.xlsx]

## Sheet: Sheet1
IC-MS analysis of UDP‑HexNAc levels of four TM resistant clones identified via insertional mutagenesis compared to control WT and AMDHD2 KO AN3-12 cells
Fig. 2B
	relative UDP-HexNAc levels (Fold change)
	replicate 1	replicate 2	replicate 3	replicate 4	replicate 5	p-value
control	1	1.12735	1.42512	1.53344	1.80579
AMDHD2 KO	2.2139	3.18434	3.2005	2.49009	3.79326	0.0035
clone 1	2.77557	2.78145	3.49135	3.82367	4.07297	0.0003
clone 2	2.72121	2.67566	3.01146	4.47471	3.9686	0.0004
clone 3	2.22588	2.58571	3.24453	3.2979	4.27653	0.0015
clone 4	3.16237	2.83132	2.91052	4.16779	4.26411	0.0002
Ordinary one-way ANOVA
Dunnett's multiple comparisons test
n = 5
