# Supplementary material for: GFPT2/GFAT2 and AMDHD2 act in tandem to control the hexosamine pathway
Source: eLife journal article supplement (doi:10.7554/elife.69223), 2022-03-01
Supplement: fig2-data1 [file Figure2C.xlsx]

## Sheet: Sheet1
IC-MS analysis of UDP‑GlcNAc levels of WT and AMDHD2 KO AN3-12 cells and both lines stably overexpressing FLAG-HA-hAMDHD2 and FLAG-HA-hAMDHD2 D294A respectively
Fig. 2C
	relative UDP-GlcNAc levels (Fold change)
	replicate 1	replicate 2	replicate 3	replicate 4	replicate 5	replicate 6	replicate 7	p-value
WT (ctrl)	1	0.903625	0.863692	0.306496	0.58712	0.450736	0.477423
WT + hAMDHD2	1.17739	0.770345	0.766396	0.316461	0.65114	0.434832	0.392792	>0,9999
WT + hAMDHD2 D294A	1.01202	0.760896	0.807722	0.426832	1.02501	0.449622	0.30551	>0,9999
AMDHD2 KO (ctrl)	2.73651	2.60925	1.808	0.831685	1.90573	0.99026	1.05406	0.0065
AMDHD2 KO + hAMDHD2	1.28966	0.975236	0.676336	1.11607	1.65192	0.760922	0.562466	0.8009
AMDHD2 KO + hAMDHD2 D294A	3.17844	1.49576	0.895808	1.57573	1.38165	1.40073	0.862546	0.0305
Ordinary one-way ANOVA
Tukey's multiple comparisons test
n = 7
