# Supplementary material for: GFPT2/GFAT2 and AMDHD2 act in tandem to control the hexosamine pathway
Source: eLife journal article supplement (doi:10.7554/elife.69223), 2022-03-01
Supplement: fig2-data1 [file Figure2D.xlsx]

## Sheet: Sheet1
Cell viability (XTT assay) of WT and AMDHD2 KO AN3-12 cells and both lines stably overexpressing HA-FLAG-hAMDHD2 and HA-FLAG-hAMDHD2 D294A respectively
Fig. 2D
	Treatment	0.5 µg/ml tunicamycin for 48h
	relative fraction alive (Fold change)
	replicate 1	replicate 2	replicate 3	replicate 4	replicate 5	replicate 6	p-value
WT (ctrl)	1	1	1	1	1	1
WT + hAMDHD2	1.05771	0.713054	1.03224	0.958898	0.876186	0.93359
WT + hAMDHD2 D294A	0.950956	0.831915	0.974211	0.802359	0.74417	0.872938
AMDHD2 KO (ctrl)	3.20786	3.52813	4.00854	2.89397	2.93368	2.62189
AMDHD2 KO + hAMDHD2	2.20873	2.55018	3.15549	2.18993	2.03499	2.02166	0.0025
AMDHD2 KO + hAMDHD2 D294A	2.56587	3.69672	3.50292	3.53838	2.93709	2.6508	0.9998
Ordinary one-way ANOVA
Tukey's multiple comparisons test
n = 6
