# Supplementary material for: GFPT2/GFAT2 and AMDHD2 act in tandem to control the hexosamine pathway
Source: eLife journal article supplement (doi:10.7554/elife.69223), 2022-03-01
Supplement: fig2-figsupp1-data1 [file elife-69223-fig2-figsupp1-data1-v3.zip]

## Sheet: Sheet1
IC-MS analysis of UDP‑HexNAc levels of WT and two additional AMDHD2 K. AN3-12 cell lines (#2-3)
Figure 2-figure supplement 1
	relative UDP-HexNAc levels (Fold change)
	replicate 1	replicate 2	replicate 3	replicate 4	p-value
WT (ctrl)	1	0.871795	1.58974	1.32051
AMDHD2 KO clone #2	2.64103	3.14103	3.08974	2.98718	<0,0001
AMDHD2 KO clone #3	2.75641	2.91026	2.97436		<0,0001
Ordinary one-way ANOVA
Dunnett's multiple comparisons test
n≥3
