# Supplementary material for: GFPT2/GFAT2 and AMDHD2 act in tandem to control the hexosamine pathway
Source: eLife journal article supplement (doi:10.7554/elife.69223), 2022-03-01
Supplement: fig3-data1 [file Figure3A.xlsx]

## Sheet: Fig. 3A
Source data for Figure 3A
Thermal Shift Assay, melting temperatures of AMDHD2 in SEC buffer in the presence of varying divalents
	melting temperature [°C]
	replicate 1	replicate 2	replicate 3
control, w/o divalent	49	49	50
MgCl2	49.33	49.67	50
CaCl2	49	49	50
MnCl2	49.67	49.67	50
CoCl2	53.33	52	52.67
NiCl2	53.67	53	53.67
CuSO4	49	49.33	50
ZnCl2	54	53.33	53.67
CdCl2	49	49.67	50
