# Supplementary material for: GFPT2/GFAT2 and AMDHD2 act in tandem to control the hexosamine pathway
Source: eLife journal article supplement (doi:10.7554/elife.69223), 2022-03-01
Supplement: fig3-data1 [file Figure3B.xlsx]

## Sheet: Fig. 3B
Source data for Figure 3B
Deacetylase activity of AMDHD2 in the presence of EDTA and several indicated divalents
	Specific activity [µmol/(min*mg)]
	replicate 1	replicate 2	replicate 3
control	17.82	13.84	14.47
EDTA	-1.581	2.406	2.085
MgCl2	-1.897	0.6999	1.642
CoCl2	26.73	17.89	17.57
NiCl2	1.326	2.217	2.717
ZnCl2	23.44	21.17	22.81
