# Supplementary material for: GFPT2/GFAT2 and AMDHD2 act in tandem to control the hexosamine pathway
Source: eLife journal article supplement (doi:10.7554/elife.69223), 2022-03-01
Supplement: fig3-data1 [file Figure3G.xlsx]

## Sheet: Fig.3G
Source data for Figure 3G
Representative analytical size-exclusion chromatography of AMDHD2 variants
WT			H242A/R243A			I280E			I280R
Elution volume [ml]	A280 [mAu]		Elution volume [ml]	A280 [mAu]		Elution volume [ml]	A280 [mAu]		Elution volume [ml]	A280 [mAu]
0	0.003		0	0		0	0.002		0	0
0.038	0.006		0.038	0		0.038	0.008		0.038	-0.002
0.076	0.006		0.076	0.002		0.076	0.013		0.076	-0.001
0.114	0.008		0.114	0.002		0.114	0.011		0.114	-0.001
0.151	0.011		0.151	0.002		0.151	0.013		0.151	-0.001
0.189	0.014		0.189	0.001		0.189	0.013		0.189	-0.003
0.227	0.012		0.227	0.003		0.227	0.012		0.227	-0.002
0.265	0.012		0.265	0.004		0.265	0.01		0.265	-0.002
0.303	0.01		0.303	0.002		0.303	0.015		0.303	-0.003
0.341	0.008		0.341	0.003		0.341	0.012		0.341	-0.002
0.379	0.008		0.379	0.006		0.379	0.009		0.379	-0.003
0.417	0.01		0.417	0.005		0.416	0.009		0.417	-0.005
0.454	0.011		0.454	0.008		0.454	0.008		0.454	-0.003
0.492	0.009		0.492	0.006		0.492	0.009		0.492	-0.001
0.53	0.006		0.53	0.012		0.53	0.013		0.53	0
0.568	0.008		0.568	0.008		0.568	0.02		0.568	0
0.606	0.012		0.606	0.013		0.606	0.022		0.606	0.003
0.644	0.012		0.644	0.017		0.644	0.022		0.644	0.005
0.682	0.012		0.682	0.021		0.682	0.027		0.682	0.006
0.72	0.009		0.72	0.021		0.719	0.025		0.72	0.009
0.757	0.009		0.757	0.025		0.757	0.023		0.757	0.01
0.795	0.009		0.795	0.025		0.795	0.025		0.795	0.011
0.833	0.007		0.833	0.024		0.833	0.026		0.833	0.009
0.871	0.012		0.871	0.023		0.871	0.025		0.871	0.009
0.909	0.017		0.909	0.023		0.909	0.026		0.909	0.013
0.947	0.02		0.947	0.023		0.947	0.029		0.947	0.01
0.985	0.021		0.985	0.022		0.984	0.035		0.985	0.01
1.023	0.026		1.023	0.023		1.022	0.034		1.023	0.009
1.06	0.024		1.06	0.023		1.06	0.033		1.06	0.012
1.098	0.023		1.098	0.026		1.098	0.035		1.098	0.01
1.136	0.021		1.136	0.027		1.136	0.034		1.136	0.011
1.174	0.021		1.174	0.027		1.174	0.031		1.174	0.01
1.212	0.022		1.212	0.027		1.212	0.032		1.212	0.012
1.25	0.026		1.25	0.023		1.249	0.031		1.25	0.009
1.288	0.027		1.288	0.028		1.287	0.033		1.288	0.014
1.326	0.029		1.326	0.024		1.325	0.033		1.326	0.016
1.363	0.032		1.363	0.025		1.363	0.033		1.363	0.017
1.401	0.035		1.401	0.028		1.401	0.035		1.401	0.019
1.439	0.032		1.439	0.029		1.439	0.04		1.439	0.027
1.477	0.033		1.477	0.029		1.477	0.035		1.477	0.031
1.515	0.036		1.515	0.031		1.514	0.037		1.515	0.036
1.553	0.034		1.553	0.029		1.552	0.036		1.553	0.042
1.591	0.036		1.591	0.027		1.59	0.032		1.591	0.043
1.629	0.033		1.629	0.027		1.628	0.029		1.629	0.044
1.666	0.037		1.666	0.024		1.666	0.033		1.666	0.042
1.704	0.038		1.704	0.027		1.704	0.035		1.704	0.045
1.742	0.043		1.742	0.026		1.742	0.037		1.742	0.048
1.78	0.042		1.78	0.027		1.78	0.043		1.78	0.051
1.818	0.042		1.818	0.029		1.817	0.043		1.818	0.051
1.856	0.038		1.856	0.032		1.855	0.042		1.856	0.053
1.894	0.04		1.894	0.03		1.893	0.04		1.894	0.054
1.931	0.036		1.931	0.027		1.931	0.037		1.931	0.055
1.969	0.04		1.969	0.028		1.969	0.034		1.969	0.055
2.007	0.039		2.007	0.025		2.007	0.039		2.007	0.052
2.045	0.037		2.045	0.025		2.045	0.036		2.045	0.052
2.083	0.033		2.083	0.025		2.082	0.037		2.083	0.051
2.121	0.033		2.121	0.021		2.12	0.038		2.121	0.05
2.159	0.034		2.159	0.02		2.158	0.041		2.159	0.049
2.197	0.036		2.197	0.019		2.196	0.042		2.197	0.047
2.234	0.037		2.234	0.02		2.234	0.045		2.234	0.048
2.272	0.038		2.272	0.024		2.272	0.04		2.272	0.045
2.31	0.041		2.31	0.026		2.31	0.039		2.31	0.042
2.348	0.042		2.348	0.023		2.347	0.037		2.348	0.042
2.386	0.041		2.386	0.022		2.385	0.035		2.386	0.045
2.424	0.045		2.424	0.022		2.423	0.036		2.424	0.042
2.462	0.045		2.462	0.021		2.461	0.041		2.462	0.043
2.5	0.046		2.5	0.023		2.499	0.042		2.5	0.045
2.537	0.046		2.537	0.028		2.537	0.046		2.537	0.047
2.575	0.046		2.575	0.026		2.575	0.046		2.575	0.046
2.613	0.043		2.613	0.028		2.613	0.049		2.613	0.046
2.651	0.041		2.651	0.023		2.65	0.048		2.651	0.048
2.689	0.04		2.689	0.019		2.688	0.045		2.689	0.05
2.727	0.04		2.727	0.015		2.726	0.043		2.727	0.049
2.765	0.04		2.765	0.015		2.764	0.041		2.765	0.052
2.803	0.045		2.803	0.012		2.802	0.042		2.803	0.052
2.84	0.046		2.84	0.013		2.84	0.044		2.84	0.05
2.878	0.046		2.878	0.014		2.878	0.046		2.878	0.051
2.916	0.049		2.916	0.019		2.915	0.049		2.916	0.053
2.954	0.048		2.954	0.024		2.953	0.05		2.954	0.053
2.992	0.048		2.992	0.025		2.991	0.053		2.992	0.054
3.03	0.047		3.03	0.025		3.029	0.049		3.03	0.053
3.068	0.047		3.068	0.026		3.067	0.048		3.068	0.051
3.106	0.043		3.106	0.022		3.105	0.048		3.106	0.049
3.143	0.039		3.143	0.02		3.143	0.047		3.143	0.052
3.181	0.036		3.181	0.018		3.18	0.047		3.181	0.052
3.219	0.033		3.219	0.018		3.218	0.049		3.219	0.052
3.257	0.032		3.257	0.018		3.256	0.052		3.257	0.05
3.295	0.035		3.295	0.015		3.294	0.055		3.295	0.049
3.333	0.04		3.333	0.015		3.332	0.056		3.333	0.044
3.371	0.045		3.371	0.017		3.37	0.057		3.371	0.044
3.409	0.046		3.409	0.019		3.408	0.053		3.409	0.045
3.446	0.046		3.446	0.024		3.445	0.051		3.446	0.047
3.484	0.048		3.484	0.026		3.483	0.046		3.484	0.051
3.522	0.046		3.522	0.03		3.521	0.043		3.522	0.05
3.56	0.05		3.56	0.026		3.559	0.044		3.56	0.05
3.598	0.057		3.598	0.023		3.597	0.041		3.598	0.047
3.636	0.062		3.636	0.017		3.635	0.041		3.636	0.049
3.674	0.064		3.674	0.015		3.673	0.04		3.674	0.046
3.712	0.066		3.712	0.01		3.711	0.046		3.712	0.047
3.749	0.062		3.749	0.01		3.748	0.046		3.749	0.047
3.787	0.058		3.787	0.014		3.786	0.053		3.787	0.047
3.825	0.053		3.825	0.015		3.824	0.054		3.825	0.046
3.863	0.049		3.863	0.019		3.862	0.056		3.863	0.045
3.901	0.047		3.901	0.019		3.9	0.054		3.901	0.045
3.939	0.047		3.939	0.012		3.938	0.052		3.939	0.043
3.977	0.053		3.977	0.009		3.976	0.051		3.977	0.041
4.014	0.056		4.014	0.005		4.013	0.049		4.014	0.039
4.052	0.059		4.052	0.001		4.051	0.048		4.052	0.039
4.09	0.062		4.09	0.002		4.089	0.047		4.09	0.037
4.128	0.059		4.128	0.004		4.127	0.048		4.128	0.041
4.166	0.058		4.166	0.009		4.165	0.049		4.166	0.046
4.204	0.054		4.204	0.011		4.203	0.047		4.204	0.049
4.242	0.053		4.242	0.018		4.241	0.049		4.242	0.054
4.28	0.054		4.28	0.018		4.278	0.047		4.28	0.055
4.317	0.055		4.317	0.018		4.316	0.046		4.317	0.054
4.355	0.052		4.355	0.016		4.354	0.046		4.355	0.057
4.393	0.055		4.393	0.012		4.392	0.044		4.393	0.057
4.431	0.057		4.431	0.011		4.43	0.042		4.431	0.055
4.469	0.063		4.469	0.011		4.468	0.043		4.469	0.054
4.507	0.065		4.507	0.013		4.506	0.044		4.507	0.054
4.545	0.067		4.545	0.016		4.543	0.042		4.545	0.053
4.583	0.065		4.583	0.022		4.581	0.045		4.583	0.052
4.62	0.061		4.62	0.019		4.619	0.048		4.62	0.054
4.658	0.06		4.658	0.015		4.657	0.051		4.658	0.057
4.696	0.065		4.696	0.016		4.695	0.05		4.696	0.055
4.734	0.068		4.734	0.012		4.733	0.054		4.734	0.058
4.772	0.07		4.772	0.007		4.771	0.054		4.772	0.056
4.81	0.074		4.81	0.007		4.809	0.053		4.81	0.055
4.848	0.073		4.848	0.007		4.846	0.053		4.848	0.054
4.886	0.074		4.886	0.007		4.884	0.056		4.886	0.055
4.923	0.073		4.923	0.01		4.922	0.057		4.923	0.054
4.961	0.075		4.961	0.018		4.96	0.06		4.961	0.053
4.999	0.074		4.999	0.021		4.998	0.06		4.999	0.053
5.037	0.074		5.037	0.023		5.036	0.057		5.037	0.05
5.075	0.075		5.075	0.019		5.074	0.056		5.075	0.049
5.113	0.076		5.113	0.02		5.111	0.053		5.113	0.044
5.151	0.078		5.151	0.015		5.149	0.056		5.151	0.039
5.189	0.076		5.189	0.013		5.187	0.056		5.189	0.04
5.226	0.073		5.226	0.018		5.225	0.058		5.226	0.041
5.264	0.067		5.264	0.022		5.263	0.059		5.264	0.039
5.302	0.06		5.302	0.022		5.301	0.057		5.302	0.04
5.34	0.06		5.34	0.028		5.339	0.057		5.34	0.045
5.378	0.059		5.378	0.029		5.376	0.06		5.378	0.045
5.416	0.061		5.416	0.026		5.414	0.062		5.416	0.045
5.454	0.065		5.454	0.027		5.452	0.06		5.454	0.044
5.492	0.072		5.492	0.026		5.49	0.062		5.492	0.047
5.529	0.072		5.529	0.028		5.528	0.064		5.529	0.047
5.567	0.075		5.567	0.026		5.566	0.061		5.567	0.043
5.605	0.08		5.605	0.026		5.604	0.065		5.605	0.044
5.643	0.079		5.643	0.02		5.642	0.068		5.643	0.043
5.681	0.076		5.681	0.023		5.679	0.065		5.681	0.043
5.719	0.077		5.719	0.026		5.717	0.066		5.719	0.042
5.757	0.072		5.757	0.031		5.755	0.067		5.757	0.043
5.794	0.071		5.794	0.032		5.793	0.065		5.794	0.04
5.832	0.07		5.832	0.037		5.831	0.065		5.832	0.041
5.87	0.068		5.87	0.035		5.869	0.069		5.87	0.04
5.908	0.068		5.908	0.031		5.907	0.067		5.908	0.038
5.946	0.072		5.946	0.029		5.944	0.066		5.946	0.04
5.984	0.071		5.984	0.028		5.982	0.067		5.984	0.036
6.022	0.068		6.022	0.023		6.02	0.068		6.022	0.033
6.06	0.069		6.06	0.023		6.058	0.067		6.06	0.033
6.097	0.066		6.097	0.027		6.096	0.069		6.097	0.036
6.135	0.065		6.135	0.03		6.134	0.07		6.135	0.036
6.173	0.066		6.173	0.033		6.172	0.072		6.173	0.039
6.211	0.069		6.211	0.033		6.209	0.07		6.211	0.04
6.249	0.069		6.249	0.032		6.247	0.07		6.249	0.042
6.287	0.07		6.287	0.031		6.285	0.07		6.287	0.043
6.325	0.07		6.325	0.03		6.323	0.07		6.325	0.036
6.363	0.071		6.363	0.033		6.361	0.071		6.363	0.033
6.4	0.072		6.4	0.033		6.399	0.073		6.4	0.03
6.438	0.067		6.438	0.035		6.437	0.075		6.438	0.026
6.476	0.066		6.476	0.034		6.474	0.073		6.476	0.023
6.514	0.062		6.514	0.033		6.512	0.07		6.514	0.026
6.552	0.058		6.552	0.033		6.55	0.068		6.552	0.029
6.59	0.059		6.59	0.031		6.588	0.064		6.59	0.031
6.628	0.064		6.628	0.03		6.626	0.063		6.628	0.034
6.666	0.066		6.666	0.032		6.664	0.061		6.666	0.038
6.703	0.07		6.703	0.032		6.702	0.058		6.703	0.038
6.741	0.07		6.741	0.029		6.74	0.058		6.741	0.04
6.779	0.067		6.779	0.031		6.777	0.061		6.779	0.04
6.817	0.066		6.817	0.031		6.815	0.061		6.817	0.041
6.855	0.064		6.855	0.032		6.853	0.06		6.855	0.043
6.893	0.062		6.893	0.036		6.891	0.062		6.893	0.045
6.931	0.061		6.931	0.035		6.929	0.066		6.931	0.045
6.969	0.061		6.969	0.037		6.967	0.068		6.969	0.044
7.006	0.059		7.006	0.034		7.005	0.066		7.006	0.045
7.044	0.06		7.044	0.034		7.042	0.066		7.044	0.042
7.082	0.062		7.082	0.031		7.08	0.064		7.082	0.047
7.12	0.061		7.12	0.029		7.118	0.063		7.12	0.052
7.158	0.063		7.158	0.03		7.156	0.059		7.158	0.052
7.196	0.067		7.196	0.025		7.194	0.06		7.196	0.051
7.234	0.066		7.234	0.027		7.232	0.059		7.234	0.051
7.272	0.063		7.272	0.031		7.27	0.058		7.272	0.053
7.309	0.062		7.309	0.033		7.307	0.055		7.309	0.057
7.347	0.057		7.347	0.032		7.345	0.06		7.347	0.059
7.385	0.057		7.385	0.037		7.383	0.06		7.385	0.063
7.423	0.061		7.423	0.035		7.421	0.06		7.423	0.066
7.461	0.063		7.461	0.037		7.459	0.059		7.461	0.063
7.499	0.066		7.499	0.036		7.497	0.057		7.499	0.058
7.537	0.068		7.537	0.034		7.535	0.056		7.537	0.054
7.575	0.067		7.575	0.029		7.572	0.058		7.575	0.05
7.612	0.069		7.612	0.03		7.61	0.061		7.612	0.045
7.65	0.068		7.65	0.029		7.648	0.061		7.65	0.039
7.688	0.066		7.688	0.034		7.686	0.063		7.688	0.035
7.726	0.065		7.726	0.038		7.724	0.068		7.726	0.038
7.764	0.063		7.764	0.042		7.762	0.068		7.764	0.04
7.802	0.064		7.802	0.04		7.8	0.068		7.802	0.039
7.84	0.065		7.84	0.039		7.838	0.07		7.84	0.045
7.877	0.068		7.877	0.038		7.875	0.072		7.877	0.046
7.915	0.069		7.915	0.035		7.913	0.069		7.915	0.047
7.953	0.071		7.953	0.031		7.951	0.07		7.953	0.046
7.991	0.069		7.991	0.033		7.989	0.074		7.991	0.047
8.029	0.068		8.029	0.034		8.027	0.074		8.029	0.051
8.067	0.069		8.067	0.035		8.065	0.074		8.067	0.05
8.105	0.069		8.105	0.037		8.103	0.075		8.105	0.052
8.143	0.085		8.143	0.04		8.14	0.074		8.143	0.055
8.18	0.14		8.18	0.039		8.178	0.072		8.18	0.057
8.218	0.244		8.218	0.038		8.216	0.073		8.218	0.054
8.256	0.396		8.256	0.038		8.254	0.071		8.256	0.055
8.294	0.624		8.294	0.04		8.292	0.072		8.294	0.054
8.332	0.857		8.332	0.038		8.33	0.071		8.332	0.057
8.37	1.109		8.37	0.039		8.368	0.073		8.37	0.06
8.408	1.334		8.408	0.038		8.405	0.078		8.408	0.063
8.446	1.498		8.446	0.04		8.443	0.079		8.446	0.067
8.483	1.62		8.483	0.038		8.481	0.077		8.483	0.067
8.521	1.675		8.521	0.037		8.519	0.08		8.521	0.067
8.559	1.688		8.559	0.039		8.557	0.078		8.559	0.064
8.597	1.663		8.597	0.038		8.595	0.077		8.597	0.066
8.635	1.613		8.635	0.037		8.633	0.075		8.635	0.066
8.673	1.547		8.673	0.039		8.671	0.077		8.673	0.065
8.711	1.477		8.711	0.044		8.708	0.078		8.711	0.065
8.749	1.402		8.749	0.044		8.746	0.08		8.749	0.065
8.786	1.326		8.786	0.044		8.784	0.083		8.786	0.065
8.824	1.261		8.824	0.044		8.822	0.085		8.824	0.062
8.862	1.194		8.862	0.043		8.86	0.084		8.862	0.066
8.9	1.137		8.9	0.039		8.898	0.079		8.9	0.062
8.938	1.081		8.938	0.041		8.936	0.074		8.938	0.062
8.976	1.032		8.976	0.042		8.973	0.07		8.976	0.063
9.014	0.995		9.014	0.042		9.011	0.07		9.014	0.063
9.052	0.958		9.052	0.039		9.049	0.07		9.052	0.062
9.089	0.929		9.089	0.042		9.087	0.071		9.089	0.064
9.127	0.9		9.127	0.039		9.125	0.074		9.127	0.062
9.165	0.875		9.165	0.041		9.163	0.074		9.165	0.06
9.203	0.856		9.203	0.043		9.201	0.079		9.203	0.061
9.241	0.838		9.241	0.051		9.238	0.079		9.241	0.063
9.279	0.825		9.279	0.053		9.276	0.077		9.279	0.067
9.317	0.81		9.317	0.052		9.314	0.072		9.317	0.068
9.355	0.798		9.355	0.047		9.352	0.072		9.355	0.068
9.392	0.786		9.392	0.04		9.39	0.071		9.392	0.065
9.43	0.78		9.43	0.036		9.428	0.069		9.43	0.068
9.468	0.769		9.468	0.03		9.466	0.07		9.468	0.062
9.506	0.763		9.506	0.035		9.503	0.072		9.506	0.059
9.544	0.759		9.544	0.037		9.541	0.07		9.544	0.058
9.582	0.754		9.582	0.038		9.579	0.07		9.582	0.06
9.62	0.75		9.62	0.038		9.617	0.074		9.62	0.061
9.657	0.748		9.657	0.041		9.655	0.076		9.657	0.062
9.695	0.742		9.695	0.04		9.693	0.075		9.695	0.065
9.733	0.738		9.733	0.041		9.731	0.077		9.733	0.069
9.771	0.74		9.771	0.039		9.769	0.078		9.771	0.07
9.809	0.742		9.809	0.037		9.806	0.078		9.809	0.07
9.847	0.744		9.847	0.03		9.844	0.082		9.847	0.068
9.885	0.746		9.885	0.031		9.882	0.088		9.885	0.069
9.923	0.743		9.923	0.032		9.92	0.093		9.923	0.064
9.96	0.741		9.96	0.031		9.958	0.094		9.96	0.063
9.998	0.74		9.998	0.033		9.996	0.092		9.998	0.064
10.036	0.741		10.036	0.038		10.034	0.089		10.036	0.065
10.074	0.742		10.074	0.039		10.071	0.083		10.074	0.067
10.112	0.748		10.112	0.038		10.109	0.083		10.112	0.07
10.15	0.755		10.15	0.039		10.147	0.083		10.15	0.071
10.188	0.763		10.188	0.039		10.185	0.082		10.188	0.073
10.226	0.765		10.226	0.038		10.223	0.081		10.226	0.074
10.263	0.769		10.263	0.033		10.261	0.082		10.263	0.068
10.301	0.766		10.301	0.033		10.299	0.078		10.301	0.064
10.339	0.769		10.339	0.03		10.336	0.077		10.339	0.063
10.377	0.766		10.377	0.028		10.374	0.078		10.377	0.059
10.415	0.77		10.415	0.03		10.412	0.08		10.415	0.059
10.453	0.771		10.453	0.036		10.45	0.081		10.453	0.066
10.491	0.775		10.491	0.038		10.488	0.08		10.491	0.069
10.529	0.779		10.529	0.039		10.526	0.079		10.529	0.068
10.566	0.781		10.566	0.041		10.564	0.079		10.566	0.069
10.604	0.78		10.604	0.036		10.601	0.079		10.604	0.067
10.642	0.785		10.642	0.034		10.639	0.082		10.642	0.067
10.68	0.791		10.68	0.031		10.677	0.085		10.68	0.064
10.718	0.792		10.718	0.033		10.715	0.087		10.718	0.063
10.756	0.797		10.756	0.032		10.753	0.089		10.756	0.063
10.794	0.803		10.794	0.034		10.791	0.089		10.794	0.064
10.832	0.811		10.832	0.034		10.829	0.087		10.832	0.06
10.869	0.817		10.869	0.035		10.867	0.085		10.869	0.063
10.907	0.826		10.907	0.032		10.904	0.081		10.907	0.063
10.945	0.835		10.945	0.03		10.942	0.077		10.945	0.061
10.983	0.839		10.983	0.03		10.98	0.072		10.983	0.064
11.021	0.845		11.021	0.033		11.018	0.072		11.021	0.067
11.059	0.856		11.059	0.036		11.056	0.067		11.059	0.07
11.097	0.863		11.097	0.039		11.094	0.072		11.097	0.071
11.135	0.871		11.135	0.041		11.132	0.075		11.135	0.076
11.172	0.883		11.172	0.042		11.169	0.082		11.172	0.079
11.21	0.891		11.21	0.04		11.207	0.084		11.21	0.076
11.248	0.896		11.248	0.037		11.245	0.086		11.248	0.076
11.286	0.903		11.286	0.037		11.283	0.082		11.286	0.072
11.324	0.91		11.324	0.041		11.321	0.083		11.324	0.069
11.362	0.916		11.362	0.044		11.359	0.082		11.362	0.068
11.4	0.921		11.4	0.044		11.397	0.087		11.4	0.074
11.438	0.929		11.438	0.044		11.434	0.091		11.438	0.072
11.475	0.936		11.475	0.045		11.472	0.092		11.475	0.073
11.513	0.943		11.513	0.044		11.51	0.091		11.513	0.073
11.551	0.952		11.551	0.043		11.548	0.09		11.551	0.07
11.589	0.96		11.589	0.043		11.586	0.089		11.589	0.068
11.627	0.968		11.627	0.047		11.624	0.085		11.627	0.066
11.665	0.977		11.665	0.042		11.662	0.084		11.665	0.067
11.703	0.99		11.703	0.043		11.7	0.082		11.703	0.067
11.74	0.996		11.74	0.045		11.737	0.085		11.74	0.068
11.778	1.008		11.778	0.043		11.775	0.081		11.778	0.069
11.816	1.02		11.816	0.043		11.813	0.082		11.816	0.067
11.854	1.026		11.854	0.048		11.851	0.082		11.854	0.066
11.892	1.032		11.892	0.05		11.889	0.083		11.892	0.068
11.93	1.042		11.93	0.058		11.927	0.079		11.93	0.066
11.968	1.051		11.968	0.059		11.965	0.08		11.968	0.068
12.006	1.064		12.006	0.063		12.002	0.086		12.006	0.07
12.043	1.078		12.043	0.061		12.04	0.085		12.043	0.075
12.081	1.093		12.081	0.059		12.078	0.085		12.081	0.076
12.119	1.107		12.119	0.059		12.116	0.084		12.119	0.078
12.157	1.122		12.157	0.062		12.154	0.086		12.157	0.08
12.195	1.135		12.195	0.064		12.192	0.086		12.195	0.078
12.233	1.149		12.233	0.068		12.23	0.089		12.233	0.076
12.271	1.162		12.271	0.071		12.267	0.093		12.271	0.077
12.309	1.179		12.309	0.071		12.305	0.098		12.309	0.077
12.346	1.191		12.346	0.073		12.343	0.102		12.346	0.08
12.384	1.205		12.384	0.079		12.381	0.105		12.384	0.085
12.422	1.219		12.422	0.083		12.419	0.106		12.422	0.088
12.46	1.236		12.46	0.088		12.457	0.107		12.46	0.085
12.498	1.255		12.498	0.088		12.495	0.111		12.498	0.086
12.536	1.275		12.536	0.092		12.532	0.113		12.536	0.087
12.574	1.293		12.574	0.092		12.57	0.117		12.574	0.086
12.612	1.31		12.612	0.094		12.608	0.122		12.612	0.087
12.649	1.323		12.649	0.099		12.646	0.121		12.649	0.086
12.687	1.335		12.687	0.104		12.684	0.124		12.687	0.092
12.725	1.348		12.725	0.106		12.722	0.124		12.725	0.092
12.763	1.363		12.763	0.106		12.76	0.125		12.763	0.099
12.801	1.379		12.801	0.106		12.798	0.126		12.801	0.1
12.839	1.395		12.839	0.109		12.835	0.127		12.839	0.103
12.877	1.41		12.877	0.112		12.873	0.128		12.877	0.103
12.915	1.43		12.915	0.115		12.911	0.13		12.915	0.102
12.952	1.448		12.952	0.119		12.949	0.133		12.952	0.101
12.99	1.469		12.99	0.123		12.987	0.136		12.99	0.101
13.028	1.493		13.028	0.122		13.025	0.141		13.028	0.099
13.066	1.517		13.066	0.129		13.063	0.147		13.066	0.102
13.104	1.539		13.104	0.138		13.1	0.157		13.104	0.1
13.142	1.567		13.142	0.143		13.138	0.164		13.142	0.1
13.18	1.596		13.18	0.151		13.176	0.166		13.18	0.104
13.218	1.628		13.218	0.16		13.214	0.169		13.218	0.107
13.255	1.657		13.255	0.169		13.252	0.171		13.255	0.111
13.293	1.694		13.293	0.178		13.29	0.174		13.293	0.116
13.331	1.727		13.331	0.189		13.328	0.178		13.331	0.119
13.369	1.77		13.369	0.201		13.365	0.179		13.369	0.122
13.407	1.817		13.407	0.212		13.403	0.188		13.407	0.128
13.445	1.864		13.445	0.224		13.441	0.193		13.445	0.133
13.483	1.917		13.483	0.24		13.479	0.199		13.483	0.139
13.52	1.966		13.52	0.256		13.517	0.207		13.52	0.149
13.558	2.017		13.558	0.276		13.555	0.216		13.558	0.153
13.596	2.065		13.596	0.298		13.593	0.224		13.596	0.16
13.634	2.118		13.634	0.325		13.63	0.233		13.634	0.165
13.672	2.178		13.672	0.351		13.668	0.251		13.672	0.174
13.71	2.239		13.71	0.383		13.706	0.272		13.71	0.186
13.748	2.322		13.748	0.425		13.744	0.303		13.748	0.199
13.786	2.41		13.786	0.465		13.782	0.349		13.786	0.221
13.823	2.512		13.823	0.527		13.82	0.401		13.823	0.249
13.861	2.653		13.861	0.595		13.858	0.478		13.861	0.289
13.899	2.824		13.899	0.67		13.896	0.564		13.899	0.34
13.937	3.101		13.937	0.772		13.933	0.673		13.937	0.393
13.975	3.548		13.975	0.878		13.971	0.804		13.975	0.464
14.013	4.298		14.013	1.007		14.009	0.936		14.013	0.543
14.051	5.544		14.051	1.136		14.047	1.096		14.051	0.631
14.089	7.315		14.089	1.304		14.085	1.262		14.089	0.742
14.126	10.191		14.126	1.473		14.123	1.433		14.126	0.856
14.164	13.674		14.164	1.644		14.161	1.617		14.164	0.988
14.202	18.542		14.202	1.874		14.198	1.791		14.202	1.121
14.24	24.438		14.24	2.135		14.236	1.965		14.24	1.263
14.278	30.734		14.278	2.612		14.274	2.112		14.278	1.407
14.316	37.762		14.316	3.434		14.312	2.255		14.316	1.523
14.354	44.828		14.354	4.7		14.35	2.366		14.354	1.645
14.392	52.38		14.392	6.842		14.388	2.44		14.392	1.746
14.429	59.176		14.429	9.786		14.426	2.495		14.429	1.827
14.467	65.38		14.467	14.274		14.463	2.514		14.467	1.89
14.505	71.273		14.505	19.689		14.501	2.502		14.505	1.928
14.543	75.784		14.543	25.99		14.539	2.464		14.543	1.938
14.581	79.742		14.581	33.497		14.577	2.404		14.581	1.93
14.619	82.555		14.619	40.643		14.615	2.321		14.619	1.902
14.657	84.06		14.657	48.889		14.653	2.225		14.657	1.863
14.695	84.58		14.695	56.869		14.691	2.12		14.695	1.81
14.732	84.079		14.732	63.573		14.728	2.002		14.732	1.74
14.77	82.635		14.77	70.134		14.766	1.891		14.77	1.668
14.808	80.5		14.808	75.295		14.804	1.772		14.808	1.583
14.846	77.833		14.846	79.549		14.842	1.664		14.846	1.492
14.884	74.507		14.884	82.359		14.88	1.561		14.884	1.417
14.922	71.186		14.922	83.97		14.918	1.464		14.922	1.346
14.96	67.33		14.96	84.571		14.956	1.388		14.96	1.285
14.998	63.249		14.998	84.282		14.994	1.319		14.998	1.226
15.035	59.718		15.035	83.159		15.031	1.272		15.035	1.183
15.073	55.774		15.073	81.419		15.069	1.245		15.073	1.151
15.111	52.209		15.111	79.448		15.107	1.236		15.111	1.131
15.149	48.803		15.149	76.945		15.145	1.245		15.149	1.122
15.187	45.358		15.187	74.45		15.183	1.286		15.187	1.132
15.225	42.458		15.225	71.824		15.221	1.359		15.225	1.161
15.263	39.584		15.263	69.116		15.259	1.492		15.263	1.217
15.3	37.182		15.3	66.776		15.296	1.706		15.3	1.314
15.338	34.79		15.338	64.319		15.334	2.013		15.338	1.473
15.376	32.646		15.376	62.363		15.372	2.53		15.376	1.728
15.414	31.019		15.414	60.293		15.41	3.208		15.414	2.103
15.452	29.424		15.452	58.38		15.448	4.286		15.452	2.632
15.49	28.272		15.49	56.911		15.486	5.776		15.49	3.449
15.528	27.286		15.528	55.326		15.524	7.868		15.528	4.503
15.566	26.537		15.566	54.035		15.561	10.938		15.566	6.124
15.603	26.076		15.603	52.791		15.599	14.374		15.603	8.411
15.641	25.779		15.641	51.592		15.637	19.544		15.641	11.062
15.679	25.678		15.679	50.598		15.675	25.6		15.679	14.954
15.717	25.703		15.717	49.576		15.713	32.855		15.717	19.531
15.755	25.835		15.755	48.644		15.751	41.713		15.755	25.347
15.793	26.008		15.793	47.611		15.789	51.134		15.793	32.63
15.831	26.193		15.831	46.566		15.827	61.519		15.831	40.137
15.869	26.317		15.869	45.569		15.864	72.197		15.869	49.201
15.906	26.369		15.906	44.356		15.902	83.411		15.906	58.299
15.944	26.304		15.944	43.133		15.94	93.697		15.944	68.883
15.982	26.11		15.982	41.718		15.978	102.894		15.982	79.496
16.02	25.779		16.02	40.132		16.016	111.493		16.02	88.292
16.058	25.31		16.058	38.506		16.054	118.134		16.058	97.836
16.096	24.639		16.096	36.724		16.092	123.167		16.096	105.352
16.134	23.848		16.134	34.899		16.129	126.636		16.134	111.954
16.172	22.956		16.172	32.809		16.167	128.078		16.172	117.174
16.209	21.878		16.209	30.779		16.205	127.832		16.209	120.32
16.247	20.84		16.247	28.705		16.243	125.881		16.247	121.9
16.285	19.598		16.285	26.503		16.281	122.287		16.285	121.838
16.323	18.323		16.323	24.479		16.319	117.438		16.323	119.999
16.361	17.177		16.361	22.437		16.357	111.596		16.361	116.799
16.399	15.924		16.399	20.448		16.394	104.54		16.399	112.406
16.437	14.754		16.437	18.69		16.432	97.248		16.437	106.585
16.475	13.574		16.475	16.934		16.47	89.666		16.475	100.615
16.512	12.477		16.512	15.423		16.508	81.345		16.512	93.446
16.55	11.486		16.55	13.933		16.546	73.933		16.55	85.963
16.588	10.489		16.588	12.647		16.584	66.435		16.588	78.756
16.626	9.682		16.626	11.497		16.622	59.427		16.626	71.491
16.664	8.857		16.664	10.396		16.659	52.615		16.664	64.618
16.702	8.105		16.702	9.52		16.697	46.415		16.702	57.463
16.74	7.543		16.74	8.649		16.735	41.14		16.74	51.174
16.778	6.945		16.778	7.871		16.773	35.952		16.778	45.352
16.815	6.47		16.815	7.263		16.811	31.846		16.815	39.801
16.853	6.021		16.853	6.657		16.849	27.782		16.853	35.262
16.891	5.598		16.891	6.164		16.887	24.167		16.891	30.805
16.929	5.256		16.929	5.706		16.925	21.411		16.929	26.864
16.967	4.92		16.967	5.307		16.962	18.623		16.967	23.685
17.005	4.639		17.005	4.953		17	16.493		17.005	20.623
17.043	4.366		17.043	4.611		17.038	14.446		17.043	18.133
17.081	4.12		17.081	4.352		17.076	12.694		17.081	15.792
17.118	3.929		17.118	4.063		17.114	11.286		17.118	13.816
17.156	3.731		17.156	3.827		17.152	9.951		17.156	12.178
17.194	3.567		17.194	3.623		17.19	8.96		17.194	10.625
17.232	3.409		17.232	3.422		17.227	7.952		17.232	9.469
17.27	3.262		17.27	3.264		17.265	7.098		17.27	8.336
17.308	3.13		17.308	3.108		17.303	6.438		17.308	7.381
17.346	3.008		17.346	2.966		17.341	5.775		17.346	6.643
17.383	2.898		17.383	2.826		17.379	5.24		17.383	5.932
17.421	2.781		17.421	2.688		17.417	4.732		17.421	5.369
17.459	2.684		17.459	2.562		17.455	4.282		17.459	4.852
17.497	2.596		17.497	2.432		17.492	3.908		17.497	4.415
17.535	2.508		17.535	2.319		17.53	3.573		17.535	4.045
17.573	2.434		17.573	2.216		17.568	3.292		17.573	3.712
17.611	2.359		17.611	2.117		17.606	3.023		17.611	3.458
17.649	2.281		17.649	2.032		17.644	2.788		17.649	3.205
17.686	2.21		17.686	1.948		17.682	2.597		17.686	3.004
17.724	2.136		17.724	1.873		17.72	2.404		17.724	2.834
17.762	2.066		17.762	1.794		17.757	2.238		17.762	2.671
17.8	2		17.8	1.723		17.795	2.08		17.8	2.55
17.838	1.94		17.838	1.651		17.833	1.941		17.838	2.427
17.876	1.883		17.876	1.57		17.871	1.824		17.876	2.316
17.914	1.83		17.914	1.503		17.909	1.724		17.914	2.215
17.952	1.785		17.952	1.436		17.947	1.635		17.952	2.121
17.989	1.734		17.989	1.371		17.985	1.552		17.989	2.034
18.027	1.683		18.027	1.315		18.023	1.472		18.027	1.95
18.065	1.635		18.065	1.26		18.06	1.405		18.065	1.88
18.103	1.588		18.103	1.208		18.098	1.332		18.103	1.81
18.141	1.539		18.141	1.163		18.136	1.268		18.141	1.746
18.179	1.493		18.179	1.117		18.174	1.211		18.179	1.692
18.217	1.454		18.217	1.078		18.212	1.155		18.217	1.646
18.255	1.422		18.255	1.036		18.25	1.105		18.255	1.601
18.292	1.393		18.292	0.999		18.288	1.062		18.292	1.561
18.33	1.374		18.33	0.957		18.325	1.026		18.33	1.523
18.368	1.356		18.368	0.924		18.363	0.987		18.368	1.488
18.406	1.342		18.406	0.899		18.401	0.955		18.406	1.451
18.444	1.327		18.444	0.874		18.439	0.934		18.444	1.424
18.482	1.31		18.482	0.854		18.477	0.905		18.482	1.4
18.52	1.295		18.52	0.839		18.515	0.883		18.52	1.38
18.558	1.281		18.558	0.82		18.553	0.856		18.558	1.364
18.595	1.266		18.595	0.801		18.59	0.829		18.595	1.341
18.633	1.249		18.633	0.78		18.628	0.809		18.633	1.317
18.671	1.232		18.671	0.762		18.666	0.788		18.671	1.29
18.709	1.216		18.709	0.742		18.704	0.775		18.709	1.262
18.747	1.196		18.747	0.724		18.742	0.762		18.747	1.235
18.785	1.178		18.785	0.708		18.78	0.749		18.785	1.207
18.823	1.158		18.823	0.687		18.818	0.74		18.823	1.178
18.861	1.133		18.861	0.668		18.856	0.729		18.861	1.15
18.898	1.111		18.898	0.651		18.893	0.713		18.898	1.122
18.936	1.085		18.936	0.629		18.931	0.697		18.936	1.091
18.974	1.057		18.974	0.61		18.969	0.676		18.974	1.057
19.012	1.029		19.012	0.591		19.007	0.661		19.012	1.031
19.05	1.002		19.05	0.573		19.045	0.644		19.05	0.994
19.088	0.978		19.088	0.552		19.083	0.633		19.088	0.955
19.126	0.951		19.126	0.532		19.121	0.622		19.126	0.92
19.163	0.926		19.163	0.512		19.158	0.611		19.163	0.885
19.201	0.902		19.201	0.493		19.196	0.6		19.201	0.851
19.239	0.876		19.239	0.475		19.234	0.588		19.239	0.816
19.277	0.854		19.277	0.464		19.272	0.572		19.277	0.783
19.315	0.83		19.315	0.457		19.31	0.558		19.315	0.76
19.353	0.81		19.353	0.443		19.348	0.545		19.353	0.734
19.391	0.794		19.391	0.429		19.386	0.528		19.391	0.711
19.429	0.775		19.429	0.415		19.423	0.515		19.429	0.685
19.466	0.762		19.466	0.397		19.461	0.504		19.466	0.663
19.504	0.746		19.504	0.384		19.499	0.493		19.504	0.637
19.542	0.731		19.542	0.376		19.537	0.482		19.542	0.614
19.58	0.721		19.58	0.368		19.575	0.473		19.58	0.593
19.618	0.708		19.618	0.36		19.613	0.462		19.618	0.573
19.656	0.694		19.656	0.353		19.651	0.454		19.656	0.559
19.694	0.68		19.694	0.347		19.688	0.443		19.694	0.544
19.732	0.666		19.732	0.339		19.726	0.434		19.732	0.533
19.769	0.652		19.769	0.333		19.764	0.424		19.769	0.522
19.807	0.638		19.807	0.327		19.802	0.415		19.807	0.513
19.845	0.631		19.845	0.32		19.84	0.402		19.845	0.501
19.883	0.622		19.883	0.311		19.878	0.389		19.883	0.493
19.921	0.617		19.921	0.301		19.916	0.38		19.921	0.478
19.959	0.611		19.959	0.292		19.954	0.37		19.959	0.47
19.997	0.607		19.997	0.286		19.991	0.361		19.997	0.456
20.035	0.599		20.035	0.283		20.029	0.352		20.035	0.45
20.072	0.593		20.072	0.279		20.067	0.347		20.072	0.444
20.11	0.585		20.11	0.279		20.105	0.34		20.11	0.439
20.148	0.58		20.148	0.275		20.143	0.333		20.148	0.429
20.186	0.57		20.186	0.271		20.181	0.327		20.186	0.415
20.224	0.566		20.224	0.264		20.219	0.319		20.224	0.403
20.262	0.559		20.262	0.265		20.256	0.306		20.262	0.388
20.3	0.55		20.3	0.258		20.294	0.299		20.3	0.375
20.338	0.545		20.338	0.253		20.332	0.291		20.338	0.361
20.375	0.539		20.375	0.251		20.37	0.281		20.375	0.354
20.413	0.53		20.413	0.248		20.408	0.278		20.413	0.342
20.451	0.519		20.451	0.243		20.446	0.264		20.451	0.335
20.489	0.507		20.489	0.239		20.484	0.25		20.489	0.327
20.527	0.495		20.527	0.228		20.521	0.239		20.527	0.318
20.565	0.48		20.565	0.216		20.559	0.227		20.565	0.309
20.603	0.466		20.603	0.201		20.597	0.211		20.603	0.304
20.641	0.454		20.641	0.193		20.635	0.204		20.641	0.297
20.678	0.439		20.678	0.179		20.673	0.192		20.678	0.288
20.716	0.429		20.716	0.166		20.711	0.183		20.716	0.285
20.754	0.419		20.754	0.161		20.749	0.17		20.754	0.278
20.792	0.41		20.792	0.152		20.786	0.164		20.792	0.272
20.83	0.402		20.83	0.142		20.824	0.16		20.83	0.267
20.868	0.396		20.868	0.137		20.862	0.157		20.868	0.266
20.906	0.389		20.906	0.135		20.9	0.153		20.906	0.262
20.944	0.382		20.944	0.124		20.938	0.151		20.944	0.259
20.981	0.379		20.981	0.12		20.976	0.148		20.981	0.259
21.019	0.377		21.019	0.118		21.014	0.143		21.019	0.25
21.057	0.378		21.057	0.117		21.052	0.139		21.057	0.241
21.095	0.376		21.095	0.119		21.089	0.137		21.095	0.238
21.133	0.375		21.133	0.122		21.127	0.137		21.133	0.23
21.171	0.376		21.171	0.126		21.165	0.134		21.171	0.224
21.209	0.369		21.209	0.133		21.203	0.134		21.209	0.218
21.246	0.369		21.246	0.137		21.241	0.134		21.246	0.217
21.284	0.367		21.284	0.136		21.279	0.136		21.284	0.216
21.322	0.366		21.322	0.137		21.317	0.142		21.322	0.217
21.36	0.359		21.36	0.136		21.354	0.144		21.36	0.22
21.398	0.362		21.398	0.13		21.392	0.149		21.398	0.22
21.436	0.357		21.436	0.128		21.43	0.148		21.436	0.211
21.474	0.356		21.474	0.122		21.468	0.149		21.474	0.204
21.512	0.351		21.512	0.119		21.506	0.151		21.512	0.201
21.549	0.35		21.549	0.114		21.544	0.154		21.549	0.196
21.587	0.347		21.587	0.112		21.582	0.158		21.587	0.19
21.625	0.344		21.625	0.113		21.619	0.158		21.625	0.189
21.663	0.339		21.663	0.118		21.657	0.156		21.663	0.187
21.701	0.332		21.701	0.117		21.695	0.153		21.701	0.181
21.739	0.33		21.739	0.117		21.733	0.149		21.739	0.177
21.777	0.328		21.777	0.112		21.771	0.145		21.777	0.173
21.815	0.325		21.815	0.108		21.809	0.14		21.815	0.171
21.852	0.329		21.852	0.103		21.847	0.139		21.852	0.17
21.89	0.328		21.89	0.097		21.885	0.139		21.89	0.176
21.928	0.324		21.928	0.097		21.922	0.136		21.928	0.174
21.966	0.319		21.966	0.098		21.96	0.137		21.966	0.17
22.004	0.319		22.004	0.098		21.998	0.137		22.004	0.165
22.042	0.313		22.042	0.095		22.036	0.137		22.042	0.163
22.08	0.306		22.08	0.092		22.074	0.137		22.08	0.157
22.118	0.303		22.118	0.09		22.112	0.132		22.118	0.157
22.155	0.298		22.155	0.086		22.15	0.129		22.155	0.155
22.193	0.294		22.193	0.083		22.187	0.131		22.193	0.152
22.231	0.29		22.231	0.082		22.225	0.127		22.231	0.15
22.269	0.286		22.269	0.079		22.263	0.124		22.269	0.145
22.307	0.285		22.307	0.079		22.301	0.127		22.307	0.138
22.345	0.285		22.345	0.077		22.339	0.128		22.345	0.14
22.383	0.284		22.383	0.075		22.377	0.13		22.383	0.137
22.421	0.278		22.421	0.072		22.415	0.13		22.421	0.135
22.458	0.269		22.458	0.064		22.452	0.129		22.458	0.135
22.496	0.261		22.496	0.055		22.49	0.127		22.496	0.138
22.534	0.244		22.534	0.048		22.528	0.126		22.534	0.129
22.572	0.234		22.572	0.037		22.566	0.119		22.572	0.124
22.61	0.22		22.61	0.025		22.604	0.116		22.61	0.112
22.648	0.199		22.648	0.01		22.642	0.115		22.648	0.103
22.686	0.176		22.686	-0.003		22.68	0.116		22.686	0.087
22.724	0.153		22.724	-0.021		22.717	0.11		22.724	0.077
22.761	0.127		22.761	-0.04		22.755	0.108		22.761	0.061
22.799	0.102		22.799	-0.063		22.793	0.103		22.799	0.049
22.837	0.081		22.837	-0.078		22.831	0.095		22.837	0.036
22.875	0.065		22.875	-0.097		22.869	0.089		22.875	0.026
22.913	0.048		22.913	-0.113		22.907	0.081		22.913	0.009
22.951	0.038		22.951	-0.127		22.945	0.076		22.951	-0.003
22.989	0.027		22.989	-0.143		22.983	0.072		22.989	-0.017
23.026	0.016		23.026	-0.156		23.02	0.069		23.026	-0.029
23.064	0.007		23.064	-0.166		23.058	0.072		23.064	-0.035
23.102	0.003		23.102	-0.174		23.096	0.071		23.102	-0.04
23.14	-0.004		23.14	-0.186		23.134	0.073		23.14	-0.045
23.178	-0.01		23.178	-0.189		23.172	0.075		23.178	-0.046
23.216	-0.008		23.216	-0.191		23.21	0.075		23.216	-0.043
23.254	-0.006		23.254	-0.193		23.248	0.073		23.254	-0.044
23.292	-0.002		23.292	-0.192		23.285	0.068		23.292	-0.042
23.329	0.004		23.329	-0.185		23.323	0.065		23.329	-0.035
23.367	0.018		23.367	-0.179		23.361	0.063		23.367	-0.029
23.405	0.027		23.405	-0.175		23.399	0.061		23.405	-0.026
23.443	0.038		23.443	-0.159		23.437	0.063		23.443	-0.016
23.481	0.054		23.481	-0.143		23.475	0.067		23.481	-0.003
23.519	0.068		23.519	-0.124		23.513	0.069		23.519	0.008
23.557	0.082		23.557	-0.104		23.55	0.076		23.557	0.02
23.595	0.096		23.595	-0.081		23.588	0.082		23.595	0.032
23.632	0.108		23.632	-0.058		23.626	0.088		23.632	0.044
23.67	0.124		23.67	-0.039		23.664	0.091		23.67	0.05
23.708	0.136		23.708	-0.022		23.702	0.094		23.708	0.058
23.746	0.149		23.746	-0.008		23.74	0.094		23.746	0.066
23.784	0.162		23.784	0.004		23.778	0.097		23.784	0.072
23.822	0.172		23.822	0.01		23.815	0.101		23.822	0.078
23.86	0.172		23.86	0.017		23.853	0.104		23.86	0.083
23.898	0.178		23.898	0.023		23.891	0.104		23.898	0.087
23.935	0.185		23.935	0.029		23.929	0.107		23.935	0.092
23.973	0.186		23.973	0.032		23.967	0.104		23.973	0.1
24.011	0.191		24.011	0.036		24.005	0.106		24.011	0.1
24.049	0.195		24.049	0.037		24.043	0.104		24.049	0.105
24.087	0.194		24.087	0.037		24.081	0.104		24.087	0.105
24.125	0.198		24.125	0.035		24.118	0.104		24.125	0.1
24.163	0.198		24.163	0.037		24.156	0.103		24.163	0.096
24.201	0.198		24.201	0.037		24.194	0.097		24.201	0.097
24.238	0.199		24.238	0.037		24.232	0.097		24.238	0.098
24.276	0.194		24.276	0.039		24.27	0.099		24.276	0.097
24.314	0.192		24.314	0.038		24.308	0.101		24.314	0.102
24.352	0.195		24.352	0.034		24.346	0.102		24.352	0.1
24.39	0.198		24.39	0.033		24.383	0.106		24.39	0.1
24.428	0.198		24.428	0.033		24.421	0.108		24.428	0.096
24.466	0.201		24.466	0.03		24.459	0.105		24.466	0.094
24.504	0.203		24.504	0.031		24.497	0.104		24.504	0.091
24.541	0.202		24.541	0.033		24.535	0.104		24.541	0.09
24.579	0.202		24.579	0.031		24.573	0.106		24.579	0.091
24.617	0.203		24.617	0.034		24.611	0.11		24.617	0.091
24.655	0.198		24.655	0.036		24.648	0.113		24.655	0.092
24.693	0.197		24.693	0.038		24.686	0.115		24.693	0.095
24.731	0.192		24.731	0.041		24.724	0.114		24.731	0.094
24.769	0.195		24.769	0.041		24.762	0.112		24.769	0.093
24.806	0.199		24.806	0.043		24.8	0.114		24.806	0.092
24.844	0.205		24.844	0.043		24.838	0.113		24.844	0.092
24.882	0.207		24.882	0.041		24.876	0.111		24.882	0.09
24.92	0.206		24.92	0.041		24.914	0.112		24.92	0.093
24.958	0.208		24.958	0.041		24.951	0.114		24.958	0.096
24.996	0.21		24.996	0.038		24.989	0.117		24.996	0.094
25.034	0.211		25.034	0.04		25.027	0.118		25.034	0.095
25.072	0.213		25.072	0.04		25.065	0.121		25.072	0.094
25.109	0.217		25.109	0.043		25.103	0.122		25.109	0.092
25.147	0.216		25.147	0.047		25.141	0.121		25.147	0.094
25.185	0.213		25.185	0.047		25.179	0.115		25.185	0.095
25.223	0.211		25.223	0.043		25.216	0.11		25.223	0.095
25.261	0.214		25.261	0.045		25.254	0.107		25.261	0.098
25.299	0.212		25.299	0.043		25.292	0.105		25.299	0.098
25.337	0.212		25.337	0.039		25.33	0.102		25.337	0.097
25.375	0.213		25.375	0.038		25.368	0.108		25.375	0.096
25.412	0.213		25.412	0.037		25.406	0.111		25.412	0.102
25.45	0.211		25.45	0.033		25.444	0.113		25.45	0.1
25.488	0.209		25.488	0.031		25.481	0.114		25.488	0.104
25.526	0.21		25.526	0.034		25.519	0.111		25.526	0.106
25.564	0.208		25.564	0.032		25.557	0.105		25.564	0.105
25.602	0.209		25.602	0.035		25.595	0.11		25.602	0.103
25.64	0.209		25.64	0.035		25.633	0.111		25.64	0.101
25.678	0.208		25.678	0.035		25.671	0.112		25.678	0.094
25.715	0.205		25.715	0.032		25.709	0.113		25.715	0.094
25.753	0.206		25.753	0.033		25.746	0.114		25.753	0.097
25.791	0.201		25.791	0.037		25.784	0.109		25.791	0.097
25.829	0.198		25.829	0.04		25.822	0.109		25.829	0.101
25.867	0.199		25.867	0.042		25.86	0.111		25.867	0.099
25.905	0.196		25.905	0.046		25.898	0.108		25.905	0.1
25.943	0.193		25.943	0.048		25.936	0.11		25.943	0.102
25.981	0.192		25.981	0.047		25.974	0.108		25.981	0.1
26.018	0.194		26.018	0.049		26.012	0.105		26.018	0.096
26.056	0.195		26.056	0.049		26.049	0.104		26.056	0.098
26.094	0.199		26.094	0.045		26.087	0.107		26.094	0.094
26.132	0.203		26.132	0.041		26.125	0.107		26.132	0.088
26.17	0.2		26.17	0.036		26.163	0.109		26.17	0.09
26.208	0.195		26.208	0.041		26.201	0.113		26.208	0.091
26.246	0.19		26.246	0.041		26.239	0.118		26.246	0.094
26.284	0.185		26.284	0.045		26.277	0.121		26.284	0.094
26.321	0.185		26.321	0.05		26.314	0.123		26.321	0.091
26.359	0.182		26.359	0.048		26.352	0.123		26.359	0.09
26.397	0.185		26.397	0.047		26.39	0.121		26.397	0.089
26.435	0.187		26.435	0.046		26.428	0.12		26.435	0.085
26.473	0.19		26.473	0.045		26.466	0.118		26.473	0.089
26.511	0.191		26.511	0.047		26.504	0.117		26.511	0.089
26.549	0.191		26.549	0.046		26.542	0.115		26.549	0.089
26.587	0.19		26.587	0.048		26.579	0.114		26.587	0.09
26.624	0.191		26.624	0.047		26.617	0.112		26.624	0.093
26.662	0.19		26.662	0.045		26.655	0.113		26.662	0.092
26.7	0.187		26.7	0.044		26.693	0.112		26.7	0.097
26.738	0.185		26.738	0.043		26.731	0.116		26.738	0.096
26.776	0.187		26.776	0.039		26.769	0.117		26.776	0.097
26.814	0.19		26.814	0.044		26.807	0.116		26.814	0.098
26.852	0.19		26.852	0.042		26.844	0.113		26.852	0.099
26.889	0.199		26.889	0.048		26.882	0.114		26.889	0.1
26.927	0.203		26.927	0.047		26.92	0.114		26.927	0.1
26.965	0.203		26.965	0.048		26.958	0.117		26.965	0.101
27.003	0.202		27.003	0.047		26.996	0.119		27.003	0.102
27.041	0.201		27.041	0.047		27.034	0.117		27.041	0.1
27.079	0.197		27.079	0.046		27.072	0.118		27.079	0.102
27.117	0.195		27.117	0.048		27.11	0.121		27.117	0.103
27.155	0.191		27.155	0.047		27.147	0.117		27.155	0.101
27.192	0.191		27.192	0.045		27.185	0.118		27.192	0.1
27.23	0.192		27.23	0.047		27.223	0.121		27.23	0.1
27.268	0.194		27.268	0.046		27.261	0.12		27.268	0.095
27.306	0.195		27.306	0.047		27.299	0.118		27.306	0.096
27.344	0.197		27.344	0.046		27.337	0.119		27.344	0.098
27.382	0.196		27.382	0.042		27.375	0.117		27.382	0.099
27.42	0.193		27.42	0.043		27.412	0.116		27.42	0.099
27.458	0.191		27.458	0.048		27.45	0.113		27.458	0.102
27.495	0.191		27.495	0.046		27.488	0.118		27.495	0.101
27.533	0.19		27.533	0.045		27.526	0.118		27.533	0.106
27.571	0.199		27.571	0.046		27.564	0.12		27.571	0.105
27.609	0.203		27.609	0.045		27.602	0.119		27.609	0.107
27.647	0.208		27.647	0.044		27.64	0.118		27.647	0.109
27.685	0.21		27.685	0.046		27.677	0.121		27.685	0.105
27.723	0.211		27.723	0.048		27.715	0.119		27.723	0.103
27.761	0.208		27.761	0.048		27.753	0.123		27.761	0.1
27.798	0.205		27.798	0.049		27.791	0.124		27.798	0.099
27.836	0.2		27.836	0.045		27.829	0.131		27.836	0.1
27.874	0.196		27.874	0.045		27.867	0.126		27.874	0.101
27.912	0.194		27.912	0.047		27.905	0.125		27.912	0.102
27.95	0.196		27.95	0.05		27.943	0.124		27.95	0.105
27.988	0.198		27.988	0.048		27.98	0.12		27.988	0.105
28.026	0.197		28.026	0.05		28.018	0.121		28.026	0.107
28.064	0.202		28.064	0.048		28.056	0.124		28.064	0.103
28.101	0.203		28.101	0.046		28.094	0.122		28.101	0.102
28.139	0.202		28.139	0.045		28.132	0.121		28.139	0.1
28.177	0.199		28.177	0.048		28.17	0.123		28.177	0.102
28.215	0.201		28.215	0.053		28.208	0.12		28.215	0.1
28.253	0.197		28.253	0.053		28.245	0.119		28.253	0.108
28.291	0.194		28.291	0.051		28.283	0.12		28.291	0.108
28.329	0.196		28.329	0.051		28.321	0.118		28.329	0.105
28.367	0.194		28.367	0.047		28.359	0.118		28.367	0.104
28.404	0.193		28.404	0.049		28.397	0.119		28.404	0.102
28.442	0.195		28.442	0.049		28.435	0.117		28.442	0.097
28.48	0.198		28.48	0.052		28.473	0.119		28.48	0.094
28.518	0.201		28.518	0.055		28.51	0.121		28.518	0.095
28.556	0.208		28.556	0.055		28.548	0.125		28.556	0.098
28.594	0.205		28.594	0.052		28.586	0.126		28.594	0.098
28.632	0.206		28.632	0.051		28.624	0.127		28.632	0.098
28.669	0.205		28.669	0.053		28.662	0.126		28.669	0.105
28.707	0.206		28.707	0.052		28.7	0.125		28.707	0.109
28.745	0.205		28.745	0.05		28.738	0.126		28.745	0.109
28.783	0.209		28.783	0.053		28.775	0.127		28.783	0.113
28.821	0.209		28.821	0.049		28.813	0.128		28.821	0.109
28.859	0.212		28.859	0.047		28.851	0.133		28.859	0.11
28.897	0.21		28.897	0.043		28.889	0.136		28.897	0.106
28.935	0.211		28.935	0.043		28.927	0.136		28.935	0.109
28.972	0.213		28.972	0.045		28.965	0.136		28.972	0.105
29.01	0.206		29.01	0.047		29.003	0.136		29.01	0.109
29.048	0.206		29.048	0.048		29.041	0.132		29.048	0.109
29.086	0.204		29.086	0.054		29.078	0.125		29.086	0.109
29.124	0.207		29.124	0.053		29.116	0.121		29.124	0.11
29.162	0.207		29.162	0.052		29.154	0.117		29.162	0.111
29.2	0.213		29.2	0.052		29.192	0.117		29.2	0.109
29.238	0.211		29.238	0.053		29.23	0.118		29.238	0.105
29.275	0.208		29.275	0.052		29.268	0.121		29.275	0.103
29.313	0.205		29.313	0.059		29.306	0.122		29.313	0.1
29.351	0.204		29.351	0.062		29.343	0.122		29.351	0.101
29.389	0.204		29.389	0.063		29.381	0.122		29.389	0.101
29.427	0.205		29.427	0.064		29.419	0.119		29.427	0.103
29.465	0.208		29.465	0.061		29.457	0.123		29.465	0.107
29.503	0.206		29.503	0.056		29.495	0.124		29.503	0.107
29.541	0.211		29.541	0.057		29.533	0.126		29.541	0.107
29.578	0.208		29.578	0.053		29.571	0.131		29.578	0.101
29.616	0.209		29.616	0.055		29.608	0.137		29.616	0.101
29.654	0.21		29.654	0.058		29.646	0.134		29.654	0.099
29.692	0.208		29.692	0.059		29.684	0.133		29.692	0.1
29.73	0.205		29.73	0.063		29.722	0.132		29.73	0.101
29.768	0.201		29.768	0.063		29.76	0.129		29.768	0.105
29.806	0.202		29.806	0.061		29.798	0.125		29.806	0.108
29.844	0.202		29.844	0.061		29.836	0.128		29.844	0.111
29.881	0.201		29.881	0.059		29.873	0.126		29.881	0.113
29.919	0.202		29.919	0.054		29.911	0.123		29.919	0.113
29.957	0.206		29.957	0.052		29.949	0.123		29.957	0.112
29.995	0.202		29.995	0.052		29.987	0.125		29.995	0.111
30.033	0.203		30.033	0.049		30.025	0.124		30.033	0.106
30.071	0.202		30.071	0.048		30.063	0.125		30.071	0.102
30.109	0.2		30.109	0.052		30.101	0.127		30.109	0.099
30.147	0.198		30.147	0.049		30.139	0.131		30.147	0.098
30.184	0.198		30.184	0.049		30.176	0.129		30.184	0.096
30.222	0.198		30.222	0.049		30.214	0.128		30.222	0.099
30.26	0.201		30.26	0.054		30.252	0.125		30.26	0.103
30.298	0.2		30.298	0.055		30.29	0.124		30.298	0.104
30.336	0.201		30.336	0.057		30.328	0.121		30.336	0.101
30.374	0.204		30.374	0.058		30.366	0.123		30.374	0.102
30.412	0.204		30.412	0.052		30.404	0.128		30.412	0.101
30.45	0.208		30.45	0.048		30.441	0.137		30.45	0.102
30.487	0.211		30.487	0.046		30.479	0.138		30.487	0.103
30.525	0.212		30.525	0.043		30.517	0.145		30.525	0.106
30.563	0.209		30.563	0.036		30.555	0.146		30.563	0.106
30.601	0.208		30.601	0.041		30.593	0.143		30.601	0.102
30.639	0.206		30.639	0.037		30.631	0.141		30.639	0.101
30.677	0.207		30.677	0.037		30.669	0.137		30.677	0.099
30.715	0.208		30.715	0.039		30.706	0.135		30.715	0.097
30.752	0.211		30.752	0.041		30.744	0.133		30.752	0.097
30.79	0.211		30.79	0.043		30.782	0.133		30.79	0.093
30.828	0.211		30.828	0.048		30.82	0.134		30.828	0.094
30.866	0.212		30.866	0.051		30.858	0.136		30.866	0.097
30.904	0.211		30.904	0.052		30.896	0.134		30.904	0.096
30.942	0.206		30.942	0.053		30.934	0.136		30.942	0.098
30.98	0.206		30.98	0.049		30.971	0.14		30.98	0.102
31.018	0.202		31.018	0.046		31.009	0.144		31.018	0.103
31.055	0.2		31.055	0.044		31.047	0.145		31.055	0.105
31.093	0.202		31.093	0.041		31.085	0.147		31.093	0.103
31.131	0.206		31.131	0.044		31.123	0.146		31.131	0.101
31.169	0.205		31.169	0.045		31.161	0.141		31.169	0.099
31.207	0.204		31.207	0.046		31.199	0.139		31.207	0.096
31.245	0.204		31.245	0.048		31.237	0.138		31.245	0.095
31.283	0.198		31.283	0.049		31.274	0.138		31.283	0.094
31.321	0.195		31.321	0.046		31.312	0.142		31.321	0.096
31.358	0.195		31.358	0.044		31.35	0.143		31.358	0.095
31.396	0.196		31.396	0.043		31.388	0.142		31.396	0.096
31.434	0.195		31.434	0.045		31.426	0.137		31.434	0.095
31.472	0.2		31.472	0.047		31.464	0.137		31.472	0.094
31.51	0.197		31.51	0.05		31.502	0.134		31.51	0.094
31.548	0.201		31.548	0.051		31.539	0.137		31.548	0.089
31.586	0.202		31.586	0.048		31.577	0.139		31.586	0.085
31.624	0.202		31.624	0.049		31.615	0.142		31.624	0.088
31.661	0.196		31.661	0.046		31.653	0.141		31.661	0.087
31.699	0.194		31.699	0.044		31.691	0.146		31.699	0.083
31.737	0.191		31.737	0.043		31.729	0.142		31.737	0.086
31.775	0.19		31.775	0.039		31.767	0.14		31.775	0.086
31.813	0.188		31.813	0.036		31.804	0.14		31.813	0.089
31.851	0.191		31.851	0.036		31.842	0.143		31.851	0.092
31.889	0.191		31.889	0.037		31.88	0.142		31.889	0.093
31.927	0.191		31.927	0.038		31.918	0.149		31.927	0.092
31.964	0.191		31.964	0.041		31.956	0.149		31.964	0.093
32.002	0.191		32.002	0.042		31.994	0.15		32.002	0.09
32.04	0.185		32.04	0.039		32.032	0.146		32.04	0.088
32.078	0.184		32.078	0.041		32.07	0.142		32.078	0.092
32.116	0.179		32.116	0.04		32.107	0.142		32.116	0.095
32.154	0.177		32.154	0.04		32.145	0.143		32.154	0.096
32.192	0.178		32.192	0.037		32.183	0.142		32.192	0.099
32.23	0.179		32.23	0.04		32.221	0.141		32.23	0.104
32.267	0.181		32.267	0.041		32.259	0.143		32.267	0.106
32.305	0.184		32.305	0.045		32.297	0.143		32.305	0.109
32.343	0.183		32.343	0.046		32.335	0.143		32.343	0.11
32.381	0.178		32.381	0.048		32.372	0.144		32.381	0.109
32.419	0.177		32.419	0.047		32.41	0.146		32.419	0.109
32.457	0.176		32.457	0.043		32.448	0.144		32.457	0.109
32.495	0.178		32.495	0.041		32.486	0.142		32.495	0.109
32.532	0.177		32.532	0.037		32.524	0.139		32.532	0.106
32.57	0.174		32.57	0.033		32.562	0.138		32.57	0.111
32.608	0.172		32.608	0.033		32.6	0.136		32.608	0.111
32.646	0.173		32.646	0.028		32.637	0.137		32.646	0.11
32.684	0.176		32.684	0.029		32.675	0.137		32.684	0.111
32.722	0.176		32.722	0.033		32.713	0.142		32.722	0.111
32.76	0.179		32.76	0.034		32.751	0.14		32.76	0.106
32.798	0.18		32.798	0.037		32.789	0.14		32.798	0.107
32.835	0.178		32.835	0.041		32.827	0.141		32.835	0.106
32.873	0.176		32.873	0.037		32.865	0.141		32.873	0.108
32.911	0.172		32.911	0.035		32.902	0.137		32.911	0.109
32.949	0.17		32.949	0.036		32.94	0.135		32.949	0.108
32.987	0.17		32.987	0.037		32.978	0.134		32.987	0.109
33.025	0.172		33.025	0.04		33.016	0.133		33.025	0.109
33.063	0.172		33.063	0.046		33.054	0.133		33.063	0.109
33.101	0.175		33.101	0.047		33.092	0.136		33.101	0.109
33.138	0.179		33.138	0.052		33.13	0.138		33.138	0.109
33.176	0.178		33.176	0.051		33.168	0.139		33.176	0.107
33.214	0.174		33.214	0.047		33.205	0.137		33.214	0.108
33.252	0.174		33.252	0.043		33.243	0.138		33.252	0.107
33.29	0.171		33.29	0.044		33.281	0.138		33.29	0.109
33.328	0.17		33.328	0.045		33.319	0.14		33.328	0.112
33.366	0.17		33.366	0.047		33.357	0.139		33.366	0.116
33.404	0.174		33.404	0.055		33.395	0.14		33.404	0.113
33.441	0.171		33.441	0.057		33.433	0.136		33.441	0.113
33.479	0.17		33.479	0.059		33.47	0.138		33.479	0.109
33.517	0.17		33.517	0.058		33.508	0.135		33.517	0.109
33.555	0.168		33.555	0.062		33.546	0.136		33.555	0.11
33.593	0.167		33.593	0.059		33.584	0.138		33.593	0.111
33.631	0.169		33.631	0.058		33.622	0.14		33.631	0.112
33.669	0.169		33.669	0.054		33.66	0.139		33.669	0.115
33.707	0.167		33.707	0.05		33.698	0.137		33.707	0.115
33.744	0.166		33.744	0.05		33.735	0.136		33.744	0.113
33.782	0.164		33.782	0.048		33.773	0.132		33.782	0.111
33.82	0.165		33.82	0.05		33.811	0.131		33.82	0.113
33.858	0.168		33.858	0.055		33.849	0.131		33.858	0.113
33.896	0.17		33.896	0.059		33.887	0.133		33.896	0.111
33.934	0.173		33.934	0.059		33.925	0.131		33.934	0.112
33.972	0.172		33.972	0.057		33.963	0.132		33.972	0.11
34.01	0.172		34.01	0.057		34	0.133		34.01	0.105
34.047	0.172		34.047	0.057		34.038	0.136		34.047	0.107
34.085	0.169		34.085	0.054		34.076	0.136		34.085	0.107
34.123	0.169		34.123	0.054		34.114	0.135		34.123	0.108
34.161	0.17		34.161	0.056		34.152	0.13		34.161	0.111
34.199	0.171		34.199	0.056		34.19	0.131		34.199	0.112
34.237	0.175		34.237	0.058		34.228	0.132		34.237	0.112
34.275	0.18		34.275	0.061		34.266	0.134		34.275	0.113
34.313	0.182		34.313	0.064		34.303	0.14		34.313	0.113
34.35	0.188		34.35	0.067		34.341	0.144		34.35	0.113
34.388	0.189		34.388	0.069		34.379	0.142		34.388	0.114
34.426	0.19		34.426	0.07		34.417	0.142		34.426	0.112
34.464	0.19		34.464	0.067		34.455	0.141		34.464	0.114
34.502	0.188		34.502	0.063		34.493	0.136		34.502	0.111
34.54	0.185		34.54	0.06		34.531	0.133		34.54	0.111
34.578	0.184		34.578	0.059		34.568	0.134		34.578	0.117
34.615	0.187		34.615	0.06		34.606	0.132		34.615	0.117
34.653	0.188		34.653	0.062		34.644	0.133		34.653	0.116
34.691	0.189		34.691	0.062		34.682	0.137		34.691	0.115
34.729	0.189		34.729	0.064		34.72	0.139		34.729	0.117
34.767	0.189		34.767	0.065		34.758	0.139		34.767	0.116
34.805	0.189		34.805	0.064		34.796	0.138		34.805	0.115
34.843	0.188		34.843	0.061		34.833	0.137		34.843	0.119
34.881	0.187		34.881	0.061		34.871	0.133		34.881	0.121
34.918	0.189		34.918	0.063		34.909	0.134		34.918	0.122
34.956	0.185		34.956	0.06		34.947	0.133		34.956	0.121
34.994	0.186		34.994	0.066		34.985	0.132		34.994	0.124
35.032	0.187		35.032	0.066		35.023	0.13		35.032	0.123
35.07	0.193		35.07	0.069		35.061	0.131		35.07	0.118
35.108	0.197		35.108	0.068		35.099	0.133		35.108	0.116
35.146	0.198		35.146	0.07		35.136	0.137		35.146	0.117
35.184	0.199		35.184	0.069		35.174	0.141		35.184	0.115
35.221	0.198		35.221	0.067		35.212	0.141		35.221	0.116
35.259	0.196		35.259	0.066		35.25	0.136		35.259	0.117
35.297	0.197		35.297	0.066		35.288	0.135		35.297	0.118
35.335	0.201		35.335	0.06		35.326	0.133		35.335	0.119
35.373	0.198		35.373	0.064		35.364	0.13		35.373	0.118
35.411	0.197		35.411	0.069		35.401	0.13		35.411	0.117
35.449	0.2		35.449	0.072		35.439	0.134		35.449	0.116
35.487	0.197		35.487	0.071		35.477	0.134		35.487	0.113
35.524	0.196		35.524	0.072		35.515	0.132		35.524	0.115
35.562	0.198		35.562	0.071		35.553	0.138		35.562	0.116
35.6	0.198		35.6	0.066		35.591	0.136		35.6	0.119
35.638	0.198		35.638	0.064		35.629	0.133		35.638	0.122
