# Supplementary material for: GFPT2/GFAT2 and AMDHD2 act in tandem to control the hexosamine pathway
Source: eLife journal article supplement (doi:10.7554/elife.69223), 2022-03-01
Supplement: fig3-data1 [file Figure3H.xlsx]

## Sheet: Fig. 3H
Source data for Figure 3H
Molecular weight of wildtype (WT) and mutant human AMDHD2 based on analytical size-exclusion chromatographies
	Molecular weight [kDa]
	replicate 1	replicate 2	replicate 3
WT	90.228	88.701	88.701
H242A/R242A	79.844	79.844	78.457
I280E	45.646	45.646	45.751
I280R	44.093	44.093	44.873
