# Supplementary material for: GFPT2/GFAT2 and AMDHD2 act in tandem to control the hexosamine pathway
Source: eLife journal article supplement (doi:10.7554/elife.69223), 2022-03-01
Supplement: fig3-data1 [file Figure3I.xlsx]

## Sheet: Fig. 3I
Source data for Figure 3I
Deacetylase activity of wildtype (WT) and mutant human AMDHD2
	Specific activity [µmol/(min*mg)]
	replicate 1	replicate 2	replicate 3	replicate 4	replicate 5	replicate 6
WT	15.82	21.81	22.99	17.98	22.01	14.53
H242A/R242A	-0.4635	-1.55	-0.09456	-0.03326	0.1374	-1.622
I280E	-1.445	-1.178	-1.516	0.7454	-3.417	-0.437
I280R	-0.9713	-1.652	-1.618	1.05	-1.183	0.2063
