# Supplementary material for: GFPT2/GFAT2 and AMDHD2 act in tandem to control the hexosamine pathway
Source: eLife journal article supplement (doi:10.7554/elife.69223), 2022-03-01
Supplement: fig3-figsupp3-data1 [file elife-69223-fig3-figsupp3-data1-v3.zip]

## Sheet: Fig.3-Supp3
Source data for Figure 3-figure supplement 3
Representative dynamic light scattering measurement of AMDHD2
Radius [nm]	Intensity [%]
0.023997	0
0.030432	0
0.0385927	0
0.0489417	0
0.0620658	0
0.0787093	0
0.099816	0
0.126583	0
0.160527	0
0.203574	0
0.258164	0
0.327393	0
0.415186	0
0.526522	0
0.667714	0
0.846767	0
1.07384	0
1.36179	0
1.72697	0
2.19008	0
2.77737	0
3.52214	25.6769
4.46664	67.1497
5.66441	7.17345
7.18337	0
9.10966	0
11.5525	0
14.6504	0
18.579	0
23.5612	0
29.8793	0
37.8918	0
48.0528	0
60.9386	0
77.2798	0
98.0031	0
124.284	0
157.611	0
199.876	0
253.475	0
321.447	0
407.646	0
516.959	0
655.587	0
831.388	0
1054.33	0
1337.06	0
1695.61	0
2150.3	0
2726.92	0
3458.17	0
4385.51	0
5561.53	0
7052.91	0
8944.21	0
11342.7	0
14384.3	0
18241.6	0
23133.3	0
29336.7	0
