# Supplementary material for: GFPT2/GFAT2 and AMDHD2 act in tandem to control the hexosamine pathway
Source: eLife journal article supplement (doi:10.7554/elife.69223), 2022-03-01
Supplement: fig4-data1 [file Figure4c.xlsx]

## Sheet: Fig. 4C
Source data for Figure 4c
Deacetylase activity of wild type (WT) and mutant human AMDHD2
	Specific activity [µmol/(min*mg)]
	replicate 1	replicate 2	replicate 3	replicate 4	replicate 5	replicate 6
WT	21.9	14.74	17.49	14.74	14.55	16.59
WT+EDTA	1.33	-1.091	0.7611	2.181	2.275	-0.04635
D294A	-1.419	-1.233	0.05011	-1.136	1.612	-0.4255
T185A	1.804	1.137	1.899	0.001252	1.233	1.613
G265R	-1.087	-1.423	-1.656	-2.7	-1.895	-2.179
I38T	19.39	18.86	17.59	16.5	14.69	17.49
