# Supplementary material for: GFPT2/GFAT2 and AMDHD2 act in tandem to control the hexosamine pathway
Source: eLife journal article supplement (doi:10.7554/elife.69223), 2022-03-01
Supplement: fig4-figsupp1-data1 [file Figure4FigureSupplement1.xlsx]

## Sheet: Fig. 4, Supp
Source data for Figure 4-figure supplement 1
SDS-gels stained with Coomassie brilliant blue of a representative bacterial test expression of the human AMDHD2 variants
full raw unedited gels
corresponding labeled gels
