# Supplementary material for: GFPT2/GFAT2 and AMDHD2 act in tandem to control the hexosamine pathway
Source: eLife journal article supplement (doi:10.7554/elife.69223), 2022-03-01
Supplement: fig5-data1 [file Figure5A.xlsx]

## Sheet: Sheet1
Relative Gfpt1 and Gfpt2 mRNA levels (qPCR) in WT AN3‑12 cells
Figure 5A
	relative mRNA level of Gfpt1 compared to Gfpt2 (normalized to Gapdh)
	replicate 1	replicate 2	replicate 3	replicate 4	p-value
Gfpt1	1	1	1	1
Gfpt2	1.951	2.213	2.3	2.357
	Unpaired t test
	two-tailed
	n =4
	<0,0001
