# Supplementary material for: GFPT2/GFAT2 and AMDHD2 act in tandem to control the hexosamine pathway
Source: eLife journal article supplement (doi:10.7554/elife.69223), 2022-03-01
Supplement: fig5-data1 [file Figure5D.xlsx]

## Sheet: Sheet1
IC-MS analysis of UDP‑GlcNAc levels of AMDHD2 KO compared to WT cells (in AN3-12 cells compared to N2a cells)
Fig. 5D
	relative UDP-GlcNAc levels (Fold change)
	replicate 1	replicate 2	replicate 3	replicate 4	replicate 5	compared to AN3-12 control
AN3-12 control	1	0.827956	1.11449	1.35381	1.19375
AN3-12 AMDHD2 KO	1.89566	1.60298	1.8388	2.6909	2.65591	p-value = 0,0001
N2a control	0.282934	0.257965	0.350543	0.352057	0.331252	p-value = 0,0018
N2a AMDHD2 KO	0.44984	0.449701	0.551438	0.470011	0.662516	p-value = 0,0192	p-value = <0.0001
Ordinary one-way ANOVA
Tukey's multiple comparisons test
n = 5
