# Supplementary material for: GFPT2/GFAT2 and AMDHD2 act in tandem to control the hexosamine pathway
Source: eLife journal article supplement (doi:10.7554/elife.69223), 2022-03-01
Supplement: fig5-data1 [file Figure5E.xlsx]

## Sheet: Sheet1
UDP‑GlcNAc dose-response assay with hGFPT1 and hGFPT2
Fig. 5E
		(representative measurement, graph)						(means, table)
	GFPT1		v [nmol/min]
		UDP-GlcNAc [µM]	replicate 1	replicate 2	replicate 3	replicate 4		GFPT1
		0	0.705724	0.631567	0.672112	0.811168		logIC50 (mean)	SD	N
		3	0.720299	0.682983	0.839178	0.665465		-4.21	0.06766	4
		10	0.675862	0.631188	0.688253	0.767775		-4.147	0.05431	4
		30	0.566763	0.525032	0.556793	0.634511		-4.375	0.0248	3
		100	0.325587	0.318466	0.317849	0.311535
		300	0.205474	0.23244	0.196122	0.274789
		1000	0.133264	0.113989	0.113514	0.124339
	GFPT2		v [nmol/min]
		UDP-GlcNAc [µM]	replicate 1	replicate 2	replicate 3	replicate 4		GFPT2
		0	0.906688	0.848246	0.856981	0.874452		logIC50 (mean)	SD	N
		3	0.84008	0.834383	0.88352	0.872886		-3.342	0.1619	4
		10	0.941915	0.84573	0.84535	0.917798		-3.431	0.1506	4
		30	0.883235	0.854655	0.898285	0.834431		-3.532	0.1859	3
		100	0.807085	0.641632	0.792035	0.793886
		300	0.495502	0.574882	0.519763	0.528783
		1000	0.200157	0.175137	0.2567	0.159281
