# Supplementary material for: GFPT2/GFAT2 and AMDHD2 act in tandem to control the hexosamine pathway
Source: eLife journal article supplement (doi:10.7554/elife.69223), 2022-03-01
Supplement: fig5-data1 [file Figure5F.xlsx]

## Sheet: Sheet1
Relative UDP‑GlcNAc levels in indicated cell lines measured by IC-MS
(normalized to those in AN3 12 mESCs)
Fig. 5F
	UDP-GlcNAc levels (µg/mg protein)
	replicate 1	replicate 2	replicate 3	replicate 4	replicate 5	replicate 6	replicate 7	replicate 8	replicate 9	replicate 10	replicate 11	replicate 12	replicate 13	replicate 14	replicate 15	compared to AN3-12 control
AN3-12 mESCs	1	1	1	1	1	1	1	1	1	1	1	1	1	1	1
E14 mESCs													0.882376	1.09269	0.554433	p-value = 0,2768
N2a	0.667617	0.814542	0.585518	0.877723	0.668845	0.688839	0.430608	0.282934	0.311569	0.314533	0.260049	0.277488				p-value = <0.0001
C2C12	0.386624	0.139462	0.33528	0.117129	0.0799869	0.206259							0.309619	0.287422	0.248736	p-value = <0.0001
Ordinary one-way ANOVA
Dunnett's multiple comparisons test
n≥3
