# Supplementary material for: GFPT2/GFAT2 and AMDHD2 act in tandem to control the hexosamine pathway
Source: eLife journal article supplement (doi:10.7554/elife.69223), 2022-03-01
Supplement: fig5-data1 [file Figure5H.xlsx]

## Sheet: Sheet1
Quantification of O-GlcNAc modified (RL2) proteins
Figure 5H
	relative RL2 expression (normalized to Tubulin and AN3-12 mESCs)
	RL2	Tubulin	normalized to Tubulin	relative RL2 expression (Fold change)		p-value
AN3-12	16825698	1059777	15.8766	1
AN3-12	17076933	1520424	11.2317	0.707435
AN3-12	19406844	1543320	12.5747	0.792028
AN3-12	12566232	1468260	8.55859	0.539068
E14	10863396	1097496	9.89835	0.623453		0.715
E14	13394430	1067931	12.5424	0.789992
E14	14524272	1371762	10.588	0.666894
E14	17647956	1661904	10.6191	0.668852
N2a	9942858	1758483	5.65422	0.356135		0.0029
N2a	11279547	2101707	5.36685	0.338034
N2a	11757798	1509273	7.79037	0.490681
N2a	11055933	1555146	7.10926	0.447781
C2C12	10922730	1352546	8.07568	0.508652		0.0144
C2C12	10785447	1423062	7.57904	0.477371
C2C12	9850599	1087938	9.05438	0.570295
C2C12	10447731	1760454	5.93468	0.373799
Ordinary one-way ANOVA
Dunnett's multiple comparisons test
n = 4
