# Supplementary material for: GFPT2/GFAT2 and AMDHD2 act in tandem to control the hexosamine pathway
Source: eLife journal article supplement (doi:10.7554/elife.69223), 2022-03-01
Supplement: fig5-data1 [file Figure5I.xlsx]

## Sheet: Sheet1
Quantification of OGA expression in different cell lines
Figure 5I
	relative OGA expression (normalized to Tubulin and AN3-12 mESCs)
	OGA	Tubulin	normalized to Tubulin	relative RL2 expression (Fold change)		p-value
AN3-12	2751273	1059777	2.59609	1
AN3-12	3294108	1520424	2.16657	0.834553
AN3-12	3468555	1543320	2.24746	0.865712
AN3-12	3291408	1468260	2.24171	0.863494
E14	2815209	1097496	2.56512	0.988072		0.9859
E14	2591730	1067931	2.42687	0.934819
E14	3607794	1371762	2.63004	1.01308
E14	3035097	1661904	1.82628	0.703473
N2a	1393281	1758483	0.79232	0.305198		<0,0001
N2a	1610145	2101707	0.766113	0.295103
N2a	1283688	1509273	0.850534	0.327622
N2a	1792206	1555146	1.15244	0.443913
C2C12	1265732	1352546	0.935814	0.360471		<0,0001
C2C12	1231929	1423062	0.865689	0.333459
C2C12	827199	1087938	0.760337	0.292878
C2C12	672462	1760454	0.381982	0.147138
Ordinary one-way ANOVA
Dunnett's multiple comparisons test
n = 4
