# Supplementary material for: GFPT2/GFAT2 and AMDHD2 act in tandem to control the hexosamine pathway
Source: eLife journal article supplement (doi:10.7554/elife.69223), 2022-03-01
Supplement: fig5-data1 [file Figure5J.xlsx]

## Sheet: Sheet1
Quantification of OGT expression in different cell lines
Figure 5J
	relative OGT expression (normalized to Tubulin and AN3-12 mESCs)
	OGT	Tubulin	normalized to Tubulin	relative RL2 expression (Fold change)		p-value
AN3-12	4192236	1059777	3.95577	1
AN3-12	2144340	1520424	1.41036	0.356531
AN3-12	4652316	1543320	3.01449	0.762047
AN3-12	3436209	1468260	2.34033	0.591623
E14	2657718	1097496	2.42162	0.612174		0.4086
E14	2311902	1067931	2.16484	0.547262
E14	2370195	1371762	1.72785	0.436791
E14	3618108	1661904	2.17709	0.550357
N2a	1097496	1758483	0.624115	0.157773		0.0017
N2a	1591407	2101707	0.757197	0.191416
N2a	1373517	1509273	0.910052	0.230057
N2a	1538082	1555146	0.989027	0.250021
C2C12	1669824	1352546	1.23458	0.312095		0.0041
C2C12	1508409	1423062	1.05997	0.267956
C2C12	1180494	1087938	1.08507	0.274302
C2C12	1277289	1760454	0.725545	0.183414
Ordinary one-way ANOVA
Dunnett's multiple comparisons test
n = 4
