# Supplementary material for: GFPT2/GFAT2 and AMDHD2 act in tandem to control the hexosamine pathway
Source: eLife journal article supplement (doi:10.7554/elife.69223), 2022-03-01
Supplement: fig5-figsupp1-data1 [file Figure5FigureSupplement1.xlsx]

## Sheet: Sheet1
Relative UDP‑GlcNAc levels of distinct mutants compared to WT AN3‑12 mESCs
Figure 5- figure supplement 1
	relative UDP-GlcNAc levels (normalized to control WT cells)
	replicate 1	replicate 2	replicate 3	replicate 4	replicate 5	replicate 6	replicate 7
control	1	0.94258	1.09132	1.35875	1.12569	1.77928	0.975513
GFPT1 G451E	0.753096	0.898521	1.83374	1.19859	1.06987	1.11474	0.845248	p-value = 0,9979
GFPT1 KO	0.992164	0.719457	0.715654	1.00992	1.34378	0.99529	0.959031	p-value = 0,9599
AMDHD2 KO	5.64828	4.37732	7.40353	2.89156	6.53114	3.51739	1.8456	p-value = <0.0001
Ordinary one-way ANOVA
Dunnett's multiple comparisons test
n = 7
