# Supplementary material for: GFPT2/GFAT2 and AMDHD2 act in tandem to control the hexosamine pathway
Source: eLife journal article supplement (doi:10.7554/elife.69223), 2022-03-01
Supplement: fig5-figsupp2-data1 [file Figure5FigureSupplement2B.xlsx]

## Sheet: Sheet1
IC-MS analysis of UDP‑GlcNAc levels of WT and AMDHD2 KO C2C12 myoblasts
Figure 5-figure supplement 2B
	relative UDP-GlcNAc levels (Fold change)
	replicate 1	replicate 2	replicate 3	replicate 4	replicate 5	replicate 6	p-value
WT (C2C12)	1	0.891632	0.836468	1.19845	0.918953	1.08403
AMDHD2 KO clone 1	1.60065	1.56793	1.30567	0.716954	1.46239	1.06512	0.1123
AMDHD2 KO clone 2	0.969288	1.36902	1.1016	1.60446	1.41936	1.57253	0.0585
Ordinary one-way ANOVA
Dunnett's multiple comparisons test
n = 6
