# Supplementary material for: GFPT2/GFAT2 and AMDHD2 act in tandem to control the hexosamine pathway
Source: eLife journal article supplement (doi:10.7554/elife.69223), 2022-03-01
Supplement: fig5-figsupp3-data1 [file Figure5FigureSupplement3A.xlsx]

## Sheet: Sheet1
L-Gln kinetic of WT human GFPT1 and WT human GFPT2
Figure 5-figure supplement 3A
	GFPT1		v [nmol/min]
		Gln [mM]	repeat 1	repeat 2	repeat 3	repeat 4	repeat 5
		0.1	0.0840555	0.0942865	0.0547868	0.054502	0.0669643
		0.25	0.17096	0.239562	0.169844	0.125383	0.158521
		0.5	0.350939	0.40143	0.338192	0.248226	0.240464
		1	0.597765	0.637953	0.477842	0.43649	0.413868
		2.5	0.87844	0.938426	0.744583	0.626796	0.620197
		5	0.880862	1.02011	0.858311	0.829398	0.735681
		10	1.20567	1.07822	0.891472	0.934414	0.660979
	GFPT2		v [nmol/min]
		Gln [mM]	repeat 1	repeat 2	repeat 3	repeat 4
		0.1	0.169535	0.172123	0.115105	0.091794
		0.25	0.33475	0.332234	0.318347	0.265958
		0.5	0.561422	0.58459	0.515157	0.540913
		1	0.743254	0.831796	0.748713	0.780522
		2.5	0.901466	1.04498	0.899781	0.87761
		5	0.905739	1.15921	0.931043	0.912385
		10	0.914284	1.07786	0.926747	1.14231
