# Supplementary material for: GFPT2/GFAT2 and AMDHD2 act in tandem to control the hexosamine pathway
Source: eLife journal article supplement (doi:10.7554/elife.69223), 2022-03-01
Supplement: fig5-figsupp3-data1 [file Figure5FigureSupplement3B.xlsx]

## Sheet: Sheet1
Fructose-6-Phosphate kinetic of WT human GFPT1 and WT human GFPT2
Figure 5-figure supplement 3B
	GFPT1		v [nmol/min]
		Frc6P [mM]	repeat 1	repeat 2	repeat 3	repeat 4	repeat 5
		0.01	0.0172418	0.0510449	0.0576889	0.0174363	0.0737316
		0.025	0.0521469	0.108799	0.121827	0.0779448	0.124226
		0.05	0.159876	0.204925	0.178058	0.156311	0.151968
		0.075	0.223755	0.191475	0.278333	0.212963	0.283615
		0.1	0.326266	0.300598	0.341401	0.229329	0.311779
		0.25	0.413059	0.447769	0.422069	0.340462	0.393095
		0.5	0.465044	0.467863	0.390178	0.319525	0.368852
	GFPT2		v [nmol/min]
		Frc6P [mM]	repeat 1	repeat 2	repeat 3	repeat 4	repeat 5	repeat 6	repeat 7	repeat 8
		0.05	0.0162696	0.025798	0.0397664	0.0240154	0.0429426	0.0558091	0.0172094	0.0465724
		0.1	0.049943	0.0695183	0.0863065	0.0852693	0.172192	0.109512	0.0823849	0.129606
		0.25	0.223593	0.258692	0.254641	0.281574	0.453441	0.311747	0.226672	0.331614
		0.5	0.368366	0.410466	0.383761	0.358611	0.391895	0.403757	0.339587	0.402526
		0.75	0.448482	0.406804	0.399641	0.401456	0.389756	0.423397	0.420545	0.425115
		1	0.427351	0.451464	0.396303	0.388168	0.32147	0.469419	0.388006	0.490129
		1.5	0.50118	0.511227	0.450233	0.415198	0.316057	0.450427	0.401618	0.473859
