# Supplementary material for: GFPT2/GFAT2 and AMDHD2 act in tandem to control the hexosamine pathway
Source: eLife journal article supplement (doi:10.7554/elife.69223), 2022-03-01
Supplement: fig6-data1 [file Figure6A.xlsx]

## Sheet: Sheet1
Western blot analysis and quantification of GFPT2 in WT AN3-12 control cells and upon partial differentiation (-LIF)
Figure 6A
	GFPT2	TUBULIN	normalized	ratio (internal ctrl)
ctrl_1	2489064	2617269	0.951016	1
minus LIF_1	2194988	3064673	0.716223	0.753113
ctrl_2	3520291	3491246	1.00832	1
minus LIF_2	2714246	4121541	0.658551	0.653118
ctrl_3	2953747	4940240	0.597895	1
minus LIF_3	2512078	4726750	0.53146	0.888884
ctrl_4	3707659	4913711	0.754554	1
minus LIF_4	2917672	4735334	0.616149	0.816574
unpaired t-test (two-tailed)
n = 4
p-value = 0,0212
							antibodies used:								antibodies used:
							Anti-GFPT2 (rb, Abcam, ab190966, 1:5000 5% milk TBST)								a-TUBULIN (ms, clone B-5-1-2, Sigma T9026, 1:5000 in 5% milk TBST)
							goat anti-rabbit IgG (HRP-conjugated, G21234, Thermo Fisher,1:5000 in 5% milk TBST)								goat anti-mouse IgG (HRP-conjugated, G21040, Thermo Fisher, 1:5000 in 5% milk TBST)
