# Supplementary material for: GFPT2/GFAT2 and AMDHD2 act in tandem to control the hexosamine pathway
Source: eLife journal article supplement (doi:10.7554/elife.69223), 2022-03-01
Supplement: fig6-data1 [file Figure6B.xlsx]

## Sheet: Sheet1
Relative Gfat2 mRNA level (qPCR) in WT AN3‑12 cells and upon partial differentiation by a 5-day LIF removal (-Lif)
Figure 6B
	relative Gfat2 mRNA level
	replicate 1	replicate 2	replicate 3	replicate 4
control	1	1.24	1.019	0.992
minus LIF	0.781	0.899	0.931	0.707
unpaired t-test (two-tailed)
n = 4
p-value = 0,0254
